# Supplementary material for: Changes of microorganism composition in fresh and stored bee pollen from Southern Germany
Source: PubMed Central journal article supplement (PMC8692275; doi:10.1007/s11356-021-13932-4), 2021-04-23

**Supporting information for:**

**Changes of microorganism composition in fresh and stored bee pollen from Southern Germany**

**Carolin Friedle <sup>1,2\*</sup> · Paul D'Alvise <sup>2</sup> · Karsten Schweikert <sup>3</sup> · Klaus Wallner <sup>1</sup> · Martin Hasselmann <sup>2</sup>**

<sup>1</sup>University of Hohenheim, Apicultural State Institute, Stuttgart, Germany

<sup>2</sup>University of Hohenheim, Institute of Animal Science, Department of Livestock Population Genomics, Stuttgart, Germany

<sup>3</sup>University of Hohenheim, Core Facility Hohenheim and Institute of Economics, Stuttgart, Germany

\*carolin\_friedle@uni-hohenheim.de

Tables S2-S5 with coding:

First: F = fresh; C = cold; RT = room temperature; W = warm

Second: Numbers 1-3 for replicates

Third: H = Hohenheim; F = Forbach; N = Nuertingen

**Table S1** Detailed palynological analysis in all samples

| classification                    | Hohenheim 2018 | Forbach 2019 | Nuertingen 2019 |
|-----------------------------------|----------------|--------------|-----------------|
| <i>Aceraceae_Acer</i>             |                | 208          |                 |
| <i>Sapindaceae_Aesculus</i>       | 2              | 49           |                 |
| <i>Apiaceae</i>                   |                |              | 4               |
| <i>Rosaceae_Aruncus dioicus</i>   |                | 2            | 209             |
| <i>Asteraceae_Bidens-T</i>        | 2              |              |                 |
| <i>Brassicaceae_Brassica-T</i>    | 38             |              |                 |
| <i>Asteraceae_Carduus</i>         | 22             |              |                 |
| <i>Cyperaceae_Carex</i>           |                | 8            |                 |
| <i>Fagaceae_Castanea sativa</i>   | 4              |              |                 |
| <i>Chenopodiaceae</i>             | 2              |              |                 |
| <i>Cornaceae_Cornus-T</i>         |                | 3            |                 |
| <i>Boraginaceae_Echium</i>        | 8              |              |                 |
| <i>Fabaceae</i>                   |                | 34           |                 |
| <i>Rosaceae_Filipendula</i>       | 52             |              | 10              |
| <i>Rosaceae_Fragaria</i>          |                |              | 2               |
| <i>Apiaceae_Heracleum</i>         |                | 12           |                 |
| <i>Cannabaceae_Humulus</i>        | 2              |              |                 |
| <i>Clusiaceae_Hypericum</i>       | 1              | 4            | 3               |
| <i>Balsaminaceae_Impatiens</i>    | 1              |              |                 |
| <i>Lamiaceae_Lamium-T</i>         |                | 3            | 14              |
| <i>Oleaceae_Ligustrum</i>         |                | 1            | 78              |
| <i>Fabaceae_Melilotus</i>         | 1              | 2            |                 |
| <i>Papaveraceae</i>               |                | 1            | 4               |
| <i>Boraginaceae_Phacelia</i>      | 96             |              |                 |
| <i>Pinaceae_Pinoideae</i>         |                | 31           |                 |
| <i>Plantaginaceae_Plantago</i>    | 72             | 17           | 24              |
| <i>Poaceae</i>                    | 8              |              | 2               |
| <i>Rosaceae_Potentilla</i>        |                |              | 44              |
| <i>Ranunculaceae</i>              |                | 59           |                 |
| <i>Orobanchaceae_Rhinanthus</i>   |                |              | 16              |
| <i>Anacardiaceae_Rhus typhina</i> |                |              | 2               |
| <i>Rosaceae_Rosa</i>              |                |              | 41              |
| <i>Rosaceae_Rubus-T</i>           | 3              | 6            | 1               |
| <i>Polygonaceae_Rumex</i>         | 2              |              | 3               |
| <i>Rosaceae_Sanguisorba minor</i> |                | 16           | 1               |
| <i>Cyperaceae_Scirpus</i>         |                | 35           |                 |
| <i>Crassulaceae_Sedum</i>         | 44             |              |                 |
| <i>Brassicaceae_Sinapis-T</i>     | 51             |              |                 |
| <i>Asteraceae_Taraxacum-T</i>     | 27             |              |                 |
| <i>Malvaceae_Tilia</i>            | 39             |              | 39              |
| <i>Fabaceae_Trifolium repens</i>  | 18             | 1            | 3               |
| <i>Adoxaceae_Viburnum</i>         |                | 8            |                 |
| <i>Poaceae_Zea mays</i>           | 5              |              |                 |

**Table S2** Calculated relative abundance of all detected bacteria in the samples

| F1H    | F2H    | F3H    | C1H    | C2H    | C3H    | RT1H   | RT2H   | W1H    | W2H    | W3H    | taxonomy                                                                                               |
|--------|--------|--------|--------|--------|--------|--------|--------|--------|--------|--------|--------------------------------------------------------------------------------------------------------|
| 0.4335 | 0.6673 | 0.8104 | 0.5924 | 0.7750 | 0.6638 | 0.8669 | 0.9062 | 0.5248 | 0.0748 | 0.5476 | Bacteria;Firmicutes;Bacilli;Lactobacillales;Lactobacillaceae;Lactobacillus;                            |
| 0.1430 | 0.0173 | 0.0255 | 0.0070 | 0.0255 | 0.0864 | 0.0149 | 0.0067 | 0.0011 | 0      | 0.0174 | Bacteria;Proteobacteria;Gammaproteobacteria;Pseudomonadales;Pseudomonadaceae;Pseudomonas;              |
| 0.0256 | 0.0505 | 0.0043 | 0.2206 | 0.0079 | 0.0834 | 0.0022 | 0.0033 | 0.0246 | 0.0200 | 0.2077 | Bacteria;Proteobacteria;Gammaproteobacteria;Pseudomonadales;Moraxellaceae;Acinetobacter;               |
| 0.1204 | 0.0038 | 0.0084 | 0.0041 | 0.0025 | 0.0064 | 0.0976 | 0.0012 | 0      | 0      | 0.0321 | Bacteria;Proteobacteria;Gammaproteobacteria;Enterobacteriales;Enterobacteriaceae;Rosenbergiella;       |
| 0.0962 | 0.0874 | 0.0167 | 0.0070 | 0.0059 | 0.0787 | 0.0016 | 0.0014 | 0.0089 | 0      | 0.0056 | Bacteria;Proteobacteria;Gammaproteobacteria;Enterobacteriales;Erwiniaceae;Pantoea                      |
| 0.0124 | 0.0117 | 0.0053 | 0.0014 | 0.0032 | 0.0045 | 0.0001 | 0.0006 | 0.3230 | 0.7537 | 0.0683 | Bacteria;Actinobacteria;Actinobacteria;Actinomycetales;Micrococcaceae;Arthrobacter;                    |
| 0.0205 | 0.0085 | 0.0054 | 0.0106 | 0.0121 | 0.0163 | 0.0004 | 0.0095 | 0.0051 | 0      | 0.0137 | Bacteria;Proteobacteria;Gammaproteobacteria;Enterobacteriales;Enterobacteriaceae;Erwinia;              |
| 0      | 0      | 0      | 0      | 0      | 0      | 0      | 0      | 0      | 0      | 0      | Bacteria;Bacteroidetes;Flavobacteriia;Flavobacteriales;Flavobacteriaceae;Epilithonimonas;              |
| 0      | 0      | 0      | 0      | 0      | 0      | 0      | 0      | 0      | 0      | 0      | Bacteria;Proteobacteria;Gammaproteobacteria;Enterobacteriales;Erwiniaceae;Phaseolibacter;              |
| 0.0106 | 0.0030 | 0.0828 | 0.0004 | 0.0015 | 0.0026 | 0.0002 | 0.0007 | 0      | 0.0002 | 0      | Bacteria;Proteobacteria;Gammaproteobacteria;Enterobacteriales;Enterobacteriaceae;Serratia;             |
| 0.0538 | 0.0566 | 0.0148 | 0.0695 | 0.0862 | 0.0323 | 0.0024 | 0.0297 | 0.0212 | 0.0001 | 0.0249 | Bacteria;Proteobacteria;Gammaproteobacteria;Enterobacteriales;Enterobacteriaceae;Arsenophonus;         |
| 0.0118 | 0.0357 | 0.0068 | 0.0134 | 0.0211 | 0.0103 | 0.0086 | 0.0127 | 0.0080 | 0      | 0.0235 | Bacteria;Proteobacteria;Alphaproteobacteria;Rhodospirillales;Acetobacteraceae;Saccharibacter;          |
| 0.0097 | 0.0130 | 0.0019 | 0.0236 | 0.0059 | 0.0034 | 0.0017 | 0.0096 | 0.0246 | 0.0215 | 0.0194 | Bacteria;Proteobacteria;Alphaproteobacteria;Sphingomonadales;Sphingomonadaceae;Sphingomonas;           |
| 0.0005 | 0      | 0      | 0.0006 | 0.0002 | 0.0001 | 0.0001 | 0.0038 | 0      | 0      | 0      | Bacteria;Bacteroidetes;Flavobacteriia;Flavobacteriales;Flavobacteriaceae;Chryseobacterium;             |
| 0.0063 | 0.0034 | 0.0012 | 0.0084 | 0.0027 | 0.0039 | 0.0007 | 0.0033 | 0.0159 | 0.0210 | 0.0132 | Bacteria;Proteobacteria;Betaproteobacteria;Burkholderiales;Oxalobacteraceae;Massilia;                  |
| 0.0004 | 0.0035 | 0.0006 | 0.0015 | 0.0097 | 0.0005 | 0.0000 | 0.0032 | 0      | 0      | 0.0011 | Bacteria;Proteobacteria;Alphaproteobacteria;Rhodospirillales;Acetobacteraceae;Gluconacetobacter;       |
| 0      | 0      | 0      | 0      | 0      | 0      | 0      | 0      | 0      | 0      | 0      | Bacteria;Proteobacteria;Betaproteobacteria;Burkholderiales;Oxalobacteraceae;Duganella;                 |
| 0.0018 | 0.0016 | 0.0002 | 0.0018 | 0.0009 | 0.0001 | 0.0001 | 0.0005 | 0.0019 | 0.0101 | 0.0017 | Bacteria;Bacteroidetes;Sphingobacteriia;Sphingobacteriales;Sphingobacteriaceae;Pedobacter;             |
| 0.0022 | 0.0085 | 0.0044 | 0.0081 | 0.0095 | 0.0043 | 0.0006 | 0.0013 | 0      | 0.0096 | 0.0064 | Bacteria;Proteobacteria;Gammaproteobacteria;Orbales;Orbaceae;Gilliamella;                              |
| 0      | 0      | 0      | 0      | 0      | 0      | 0      | 0      | 0      | 0      | 0      | Bacteria;Cyanobacteria;Cyanobacteria;Synechococcales;Synechococcaceae;Cyanobium                        |
| 0      | 0      | 0      | 0      | 0      | 0      | 0      | 0      | 0.0114 | 0.0362 | 0      | Bacteria;Firmicutes;Clostridia;Clostridiales;Lachnospiraceae;Fusicatenibacter;                         |
| 0.0017 | 0.0085 | 0.0008 | 0.0056 | 0.0032 | 0.0006 | 0.0005 | 0.0020 | 0.0234 | 0      | 0      | Bacteria;Proteobacteria;Gammaproteobacteria;Oceanospirillales;Halomonadaceae;Carnimonas;               |
| 0.0003 | 0.0026 | 0.0002 | 0.0027 | 0.0046 | 0.0006 | 0.0001 | 0.0010 | 0.0060 | 0.0154 | 0.0079 | Bacteria;Proteobacteria;Gammaproteobacteria;Enterobacteriales;Enterobacteriaceae;Escherichia/Shigella; |
| 0.0170 | 0.0081 | 0.0029 | 0.0014 | 0.0006 | 0.0006 | 0.0006 | 0.0004 | 0      | 0      | 0      | Bacteria;Proteobacteria;Gammaproteobacteria;Enterobacteriales;Enterobacteriaceae;Citrobacter;          |
| 0.0127 | 0      | 0.0004 | 0.0005 | 0.0006 | 0.0001 | 0.0000 | 0.0005 | 0      | 0.0139 | 0.0007 | Bacteria;Firmicutes;Bacilli;Lactobacillales;Streptococcaceae;Lactococcus;                              |
| 0      | 0      | 0      | 0      | 0      | 0      | 0      | 0      | 0      | 0      | 0      | Bacteria;Proteobacteria;Alphaproteobacteria;Rhizobiales;Bradyrhizobiaceae;Bradyrhizobium;              |

|        |        |        |        |        |        |        |        |   |        |        |                                                                                                 |
|--------|--------|--------|--------|--------|--------|--------|--------|---|--------|--------|-------------------------------------------------------------------------------------------------|
| 0      | 0      | 0      | 0      | 0      | 0      | 0      | 0      | 0 | 0.0182 | 0.0011 | Bacteria;Bacteroidetes;Bacteroidia;Bacteroidales;Bacteroidaceae;Bacteroides;                    |
| 0.0160 | 0.0004 | 0.0012 | 0.0002 | 0.0005 | 0.0002 | 0.0001 | 0.0003 | 0 | 0      | 0      | Bacteria;Proteobacteria;Alphaproteobacteria;Rickettsiales;Rickettsiaceae;Rickettsia;            |
| 0      | 0      | 0      | 0      | 0      | 0      | 0      | 0      | 0 | 0      | 0      | Bacteria;Proteobacteria;Alphaproteobacteria;Rhodobacterales;Rhodobacteraceae;Actibacterium      |
| 0.0012 | 0.0023 | 0.0019 | 0.0043 | 0.0039 | 0.0003 | 0.0000 | 0.0006 | 0 | 0      | 0.0010 | Bacteria;Proteobacteria;Betaproteobacteria;Neisseriales;Neisseriaceae;Snodgrassella;            |
| 0      | 0      | 0      | 0      | 0      | 0      | 0      | 0      | 0 | 0      | 0      | Bacteria;Proteobacteria;Gammaproteobacteria;Enterobacteriales;Enterobacteriaceae;Pectobacterium |
| 0.0008 | 0.0027 | 0.0002 | 0.0036 | 0.0007 | 0.0001 | 0.0001 | 0.0003 | 0 | 0.0001 | 0.0035 | Bacteria;Proteobacteria;Alphaproteobacteria;Rhodospirillales;Acetobacteraceae;Neokomagataea;    |
| 0.0011 | 0.0012 | 0.0013 | 0.0016 | 0.0033 | 0.0003 | 0.0002 | 0.0010 | 0 | 0      | 0.0015 | Bacteria;Proteobacteria;Gammaproteobacteria;Orbales;Orbaceae;Frischella;                        |
| 0.0004 | 0.0015 | 0.0024 | 0.0005 | 0.0050 | 0.0002 | 0.0001 | 0.0004 | 0 | 0      | 0.0005 | Bacteria;Proteobacteria;Alphaproteobacteria;Rhizobiales;Bartonellaceae;Batronella;              |
| 0      | 0.0003 | 0      | 0.0001 | 0.0075 | 0      | 0.0000 | 0.0000 | 0 | 0      | 0      | Bacteria;Bacteroidetes;Flavobacteriia;Flavobacteriales;Flavobacteriaceae;Apibacter;             |
| 0.0002 | 0.0007 | 0.0000 | 0.0002 | 0.0002 | 0.0001 | 0.0000 | 0.0001 | 0 | 0.0052 | 0      | Bacteria;Firmicutes;Bacilli;Bacillales;Staphylococcaceae;Staphylococcus;                        |
| 0      | 0      | 0      | 0.0051 | 0      | 0.0001 | 0      | 0      | 0 | 0      | 0.0012 | Bacteria;Proteobacteria;Gammaproteobacteria;Oceanospirillales;Halomonadaceae;Halotalea;         |
| 0      | 0      | 0      | 0.0039 | 0      | 0      | 0.0000 | 0.0000 | 0 | 0      | 0      | Bacteria;Bacteroidetes;Flavobacteriia;Flavobacteriales;Flavobacteriaceae;Flavobacterium;        |

| F1F    | F2F    | F3F    | C1F    | C2F    | C3F    | RT1F   | RT2F   | RT3F   | W1F    | W2F    | W3F    | taxonomy                                                                                               |
|--------|--------|--------|--------|--------|--------|--------|--------|--------|--------|--------|--------|--------------------------------------------------------------------------------------------------------|
| 0.5824 | 0.8154 | 0.7050 | 0.7270 | 0.4291 | 0.6423 | 0.5668 | 0.5939 | 0.6394 | 0.9061 | 0.5689 | 0.8142 | Bacteria;Firmicutes;Bacilli;Lactobacillales;Lactobacillaceae;Lactobacillus;                            |
| 0.1086 | 0.0126 | 0.0356 | 0.0557 | 0.1557 | 0.1447 | 0.1173 | 0.1578 | 0.1004 | 0.0211 | 0.0641 | 0.0277 | Bacteria;Proteobacteria;Gammaproteobacteria;Pseudomonadales;Pseudomonadaceae;Pseudomonas;              |
| 0.0233 | 0.0041 | 0.0137 | 0.0192 | 0.0062 | 0.0046 | 0.0398 | 0.0150 | 0.0285 | 0.0005 | 0.1711 | 0.0076 | Bacteria;Proteobacteria;Gammaproteobacteria;Pseudomonadales;Moraxellaceae;Acinetobacter;               |
| 0.1586 | 0.0390 | 0.1071 | 0.0515 | 0.0477 | 0.0603 | 0.1209 | 0.0730 | 0.0275 | 0.0275 | 0.0572 | 0.0423 | Bacteria;Proteobacteria;Gammaproteobacteria;Enterobacteriales;Enterobacteriaceae;Rosenbergiella;       |
| 0.0139 | 0.0043 | 0.0072 | 0.0461 | 0.0092 | 0.0252 | 0.0072 | 0.0189 | 0.0017 | 0.0055 | 0.0016 | 0.0174 | Bacteria;Proteobacteria;Gammaproteobacteria;Enterobacteriales;Erwiniaceae;Pantoea                      |
| 0      | 0      | 0      | 0      | 0      | 0      | 0      | 0      | 0      | 0      | 0      | 0      | Bacteria;Actinobacteria;Actinobacteria;Actinomycetales;Micrococcaceae;Arthrobacter;                    |
| 0.0080 | 0.0046 | 0.0436 | 0.0050 | 0.0101 | 0.0226 | 0.0202 | 0.0183 | 0.0062 | 0.0005 | 0.0276 | 0.0024 | Bacteria;Proteobacteria;Gammaproteobacteria;Enterobacteriales;Enterobacteriaceae;Erwinia;              |
| 0      | 0      | 0      | 0      | 0.0003 | 0.0003 | 0      | 0      | 0.0002 | 0      | 0      | 0.0003 | Bacteria;Bacteroidetes;Flavobacteriia;Flavobacteriales;Flavobacteriaceae;Epilithonimonas;              |
| 0.0417 | 0.0623 | 0.0432 | 0.0398 | 0.2524 | 0.0529 | 0.0583 | 0.0469 | 0.0449 | 0.0033 | 0.0328 | 0.0484 | Bacteria;Proteobacteria;Gammaproteobacteria;Enterobacteriales;Erwiniaceae;Phaseolibacter;              |
| 0.0242 | 0.0151 | 0.0104 | 0.0231 | 0.0359 | 0.0037 | 0.0101 | 0.0111 | 0.1169 | 0.0008 | 0.0126 | 0.0049 | Bacteria;Proteobacteria;Gammaproteobacteria;Enterobacteriales;Enterobacteriaceae;Serratia;             |
| 0      | 0.0006 | 0.0006 | 0      | 0      | 0      | 0      | 0      | 0      | 0      | 0.0004 | 0      | Bacteria;Proteobacteria;Gammaproteobacteria;Enterobacteriales;Enterobacteriaceae;Arsenophonus;         |
| 0.0116 | 0.0351 | 0.0259 | 0.0195 | 0.0096 | 0.0203 | 0.0081 | 0.0274 | 0.0212 | 0.0168 | 0.0126 | 0.0183 | Bacteria;Proteobacteria;Alphaproteobacteria;Rhodospirillales;Acetobacteraceae;Saccharibacter;          |
| 0.0057 | 0.0007 | 0.0012 | 0.0021 | 0.0039 | 0.0057 | 0.0046 | 0.0124 | 0.0031 | 0.0025 | 0.0191 | 0.0058 | Bacteria;Proteobacteria;Alphaproteobacteria;Sphingomonadales;Sphingomonadaceae;Sphingomonas;           |
| 0.0001 | 0      | 0      | 0      | 0      | 0      | 0      | 0.0007 | 0      | 0      | 0.0004 | 0.0003 | Bacteria;Bacteroidetes;Flavobacteriia;Flavobacteriales;Flavobacteriaceae;Chryseobacterium;             |
| 0.0105 | 0.0041 | 0.0050 | 0.0067 | 0.0140 | 0.0129 | 0.0117 | 0.0176 | 0.0077 | 0.0146 | 0.0195 | 0.0058 | Bacteria;Proteobacteria;Betaproteobacteria;Burkholderiales;Oxalobacteraceae;Massilia;                  |
| 0      | 0.0011 | 0      | 0      | 0.0002 | 0      | 0      | 0      | 0      | 0.0005 | 0.0004 | 0      | Bacteria;Proteobacteria;Alphaproteobacteria;Rhodospirillales;Acetobacteraceae;Gluconacetobacter;       |
| 0.0050 | 0.0004 | 0.0001 | 0.0011 | 0.0017 | 0.0017 | 0.0111 | 0.0065 | 0.0013 | 0      | 0.0032 | 0.0006 | Bacteria;Proteobacteria;Betaproteobacteria;Burkholderiales;Oxalobacteraceae;Duganella;                 |
| 0.0003 | 0.0002 | 0      | 0.0007 | 0      | 0.0026 | 0.0238 | 0.0007 | 0.0010 | 0.0003 | 0.0004 | 0      | Bacteria;Bacteroidetes;Sphingobacteriia;Sphingobacteriales;Sphingobacteriaceae;Pedobacter;             |
| 0.0001 | 0.0002 | 0.0001 | 0      | 0.0226 | 0.0003 | 0      | 0      | 0      | 0      | 0      | 0      | Bacteria;Proteobacteria;Gammaproteobacteria;Orbales;Orbaceae;Gilliamella;                              |
| 0.0060 | 0.0002 | 0.0013 | 0.0021 | 0      | 0      | 0      | 0      | 0      | 0      | 0.0077 | 0.0040 | Bacteria;Cyanobacteria;Cyanobacteria;Synechococcales;Synechococcaceae;Cyanobium                        |
| 0      | 0      | 0      | 0      | 0      | 0      | 0      | 0      | 0      | 0      | 0      | 0      | Bacteria;Firmicutes;Clostridia;Clostridiales;Lachnospiraceae;Fusicatenibacter;                         |
| 0      | 0      | 0      | 0      | 0      | 0      | 0      | 0      | 0      | 0      | 0      | 0      | Bacteria;Proteobacteria;Gammaproteobacteria;Oceanospirillales;Halomonadaceae;Carnimonas;               |
| 0      | 0      | 0      | 0      | 0      | 0      | 0      | 0      | 0      | 0      | 0      | 0      | Bacteria;Proteobacteria;Gammaproteobacteria;Enterobacteriales;Enterobacteriaceae;Escherichia/Shigella; |
| 0      | 0      | 0      | 0      | 0      | 0      | 0      | 0      | 0      | 0      | 0      | 0      | Bacteria;Proteobacteria;Gammaproteobacteria;Enterobacteriales;Enterobacteriaceae;Citrobacter;          |
| 0      | 0      | 0      | 0      | 0      | 0      | 0      | 0      | 0      | 0      | 0      | 0      | Bacteria;Firmicutes;Bacilli;Lactobacillales;Streptococcaceae;Lactococcus;                              |
| 0      | 0      | 0      | 0      | 0      | 0      | 0      | 0      | 0      | 0      | 0      | 0      | Bacteria;Proteobacteria;Alphaproteobacteria;Rhizobiales;Bradyrhizobiaceae;Bradyrhizobium;              |
| 0      | 0      | 0      | 0      | 0      | 0      | 0      | 0      | 0      | 0      | 0      | 0      | Bacteria;Bacteroidetes;Bacteroidia;Bacteroidales;Bacteroidaceae;Bacteroides;                           |
| 0      | 0      | 0      | 0      | 0      | 0      | 0      | 0      | 0      | 0      | 0      | 0      | Bacteria;Proteobacteria;Alphaproteobacteria;Rickettsiales;Rickettsiaceae;Rickettsia;                   |

|   |   |   |        |        |   |   |   |   |   |        |   |                                                                                                 |
|---|---|---|--------|--------|---|---|---|---|---|--------|---|-------------------------------------------------------------------------------------------------|
| 0 | 0 | 0 | 0      | 0      | 0 | 0 | 0 | 0 | 0 | 0      | 0 | Bacteria;Proteobacteria;Alphaproteobacteria;Rhodobacterales;Rhodobacteraceae;Actibacterium      |
| 0 | 0 | 0 | 0      | 0      | 0 | 0 | 0 | 0 | 0 | 0      | 0 | Bacteria;Proteobacteria;Betaproteobacteria;Neisseriales;Neisseriaceae;Snodgrassella;            |
| 0 | 0 | 0 | 0.0004 | 0.0014 | 0 | 0 | 0 | 0 | 0 | 0.0004 | 0 | Bacteria;Proteobacteria;Gammaproteobacteria;Enterobacteriales;Enterobacteriaceae;Pectobacterium |
| 0 | 0 | 0 | 0      | 0      | 0 | 0 | 0 | 0 | 0 | 0      | 0 | Bacteria;Proteobacteria;Alphaproteobacteria;Rhodospirillales;Acetobacteraceae;Neokomagataea;    |
| 0 | 0 | 0 | 0      | 0      | 0 | 0 | 0 | 0 | 0 | 0      | 0 | Bacteria;Proteobacteria;Gammaproteobacteria;Orbales;Orbaceae;Frischella;                        |
| 0 | 0 | 0 | 0      | 0      | 0 | 0 | 0 | 0 | 0 | 0      | 0 | Bacteria;Proteobacteria;Alphaproteobacteria;Rhizobiales;Bartonellaceae;Bartonella;              |
| 0 | 0 | 0 | 0      | 0      | 0 | 0 | 0 | 0 | 0 | 0      | 0 | Bacteria;Bacteroidetes;Flavobacteriia;Flavobacteriales;Flavobacteriaceae;Apiibacter;            |
| 0 | 0 | 0 | 0      | 0      | 0 | 0 | 0 | 0 | 0 | 0      | 0 | Bacteria;Firmicutes;Bacilli;Bacillales;Staphylococcaceae;Staphylococcus;                        |
| 0 | 0 | 0 | 0      | 0      | 0 | 0 | 0 | 0 | 0 | 0      | 0 | Bacteria;Proteobacteria;Gammaproteobacteria;Oceanospirillales;Halomonadaceae;Halotalea;         |
| 0 | 0 | 0 | 0      | 0      | 0 | 0 | 0 | 0 | 0 | 0      | 0 | Bacteria;Bacteroidetes;Flavobacteriia;Flavobacteriales;Flavobacteriaceae;Flavobacterium;        |

| F1N    | F2N    | F3N    | C1N    | C2N    | C3N    | RT1N   | RT2N   | RT3N   | W1N    | W2N    | W3N    | taxonomy                                                                                               |
|--------|--------|--------|--------|--------|--------|--------|--------|--------|--------|--------|--------|--------------------------------------------------------------------------------------------------------|
| 0.0479 | 0.0035 | 0.0143 | 0.0459 | 0.0570 | 0.0135 | 0.0015 | 0.0062 | 0.0524 | 0.0348 | 0.0273 | 0.0045 | Bacteria;Firmicutes;Bacilli;Lactobacillales;Lactobacillaceae;Lactobacillus;                            |
| 0.3984 | 0.1424 | 0.5023 | 0.3574 | 0.5189 | 0.3670 | 0.2967 | 0.2924 | 0.4553 | 0.1264 | 0.4771 | 0.2746 | Bacteria;Proteobacteria;Gammaproteobacteria;Pseudomonadales;Pseudomonadaceae;Pseudomonas;              |
| 0.2276 | 0.2436 | 0.1581 | 0.1220 | 0.1436 | 0.1489 | 0.2432 | 0.1671 | 0.0531 | 0.3207 | 0.0647 | 0.3570 | Bacteria;Proteobacteria;Gammaproteobacteria;Pseudomonadales;Moraxellaceae;Acinetobacter;               |
| 0.0617 | 0.3576 | 0.0128 | 0.0267 | 0.0121 | 0.0183 | 0.1409 | 0.0250 | 0.0128 | 0.0723 | 0.0066 | 0.0719 | Bacteria;Proteobacteria;Gammaproteobacteria;Enterobacteriales;Enterobacteriaceae;Rosenbergiella;       |
| 0.0806 | 0.0144 | 0.0951 | 0.0343 | 0.0410 | 0.0448 | 0.0661 | 0.0399 | 0.0838 | 0.1250 | 0.0755 | 0.0419 | Bacteria;Proteobacteria;Gammaproteobacteria;Enterobacteriales;Erwiniaceae;Pantoea                      |
| 0      | 0      | 0      | 0      | 0      | 0      | 0      | 0      | 0      | 0      | 0      | 0      | Bacteria;Actinobacteria;Actinobacteria;Actinomycetales;Micrococcaceae;Arthrobacter;                    |
| 0.0369 | 0.0199 | 0.0373 | 0.0918 | 0.0236 | 0.0109 | 0.0425 | 0.0325 | 0.1743 | 0.2005 | 0.0360 | 0.0374 | Bacteria;Proteobacteria;Gammaproteobacteria;Enterobacteriales;Enterobacteriaceae;Erwinia;              |
| 0.0447 | 0.0756 | 0.0543 | 0.1232 | 0.0694 | 0.0446 | 0.0083 | 0.2012 | 0.0711 | 0.0182 | 0.1237 | 0.0746 | Bacteria;Bacteroidetes;Flavobacteriia;Flavobacteriales;Flavobacteriaceae;Epilithonimonas;              |
| 0.0016 | 0      | 0      | 0.0029 | 0.0026 | 0      | 0.0001 | 0.0018 | 0      | 0.0016 | 0.0007 | 0.0009 | Bacteria;Proteobacteria;Gammaproteobacteria;Enterobacteriales;Erwiniaceae;Phaseolibacter;              |
| 0.0152 | 0.0242 | 0.0126 | 0.0279 | 0.0644 | 0.0212 | 0.0250 | 0.0149 | 0.0092 | 0.0104 | 0.0273 | 0.0353 | Bacteria;Proteobacteria;Gammaproteobacteria;Enterobacteriales;Enterobacteriaceae;Serratia;             |
| 0.0010 | 0.0002 | 0      | 0.0174 | 0.0086 | 0.1032 | 0.0005 | 0.0010 | 0.0010 | 0.0088 | 0.0388 | 0.0003 | Bacteria;Proteobacteria;Gammaproteobacteria;Enterobacteriales;Enterobacteriaceae;Arsenophonus;         |
| 0.0131 | 0.0037 | 0.0049 | 0.0401 | 0.0132 | 0.0065 | 0.0041 | 0.0087 | 0.0074 | 0.0158 | 0.0119 | 0.0054 | Bacteria;Proteobacteria;Alphaproteobacteria;Rhodospirillales;Acetobacteraceae;Saccharibacter;          |
| 0.0183 | 0.0067 | 0.0259 | 0.0540 | 0.0067 | 0.0102 | 0.0054 | 0.0238 | 0.0064 | 0.0075 | 0.0147 | 0.0150 | Bacteria;Proteobacteria;Alphaproteobacteria;Sphingomonadales;Sphingomonadaceae;Sphingomonas;           |
| 0.0204 | 0.0680 | 0.0151 | 0.0267 | 0.0183 | 0.0216 | 0.0017 | 0.1237 | 0.0213 | 0.0080 | 0.0266 | 0.0249 | Bacteria;Bacteroidetes;Flavobacteriia;Flavobacteriales;Flavobacteriaceae;Chryseobacterium;             |
| 0.0110 | 0.0088 | 0.0116 | 0.0139 | 0.0082 | 0.0220 | 0.0134 | 0.0050 | 0.0154 | 0.0147 | 0.0115 | 0.0174 | Bacteria;Proteobacteria;Betaproteobacteria;Burkholderiales;Oxalobacteraceae;Massilia;                  |
| 0.0031 | 0.0009 | 0.0012 | 0.0041 | 0.0060 | 0.0891 | 0.1298 | 0.0017 | 0.0173 | 0.0110 | 0.0021 | 0.0018 | Bacteria;Proteobacteria;Alphaproteobacteria;Rhodospirillales;Acetobacteraceae;Gluconacetobacter;       |
| 0.0139 | 0.0098 | 0.0146 | 0.0023 | 0.0018 | 0.0698 | 0.0062 | 0.0189 | 0.0104 | 0.0118 | 0.0220 | 0.0279 | Bacteria;Proteobacteria;Betaproteobacteria;Burkholderiales;Oxalobacteraceae;Duganella;                 |
| 0.0044 | 0.0204 | 0.0086 | 0.0093 | 0.0044 | 0.0077 | 0.0017 | 0.0357 | 0.0087 | 0.0016 | 0.0091 | 0.0084 | Bacteria;Bacteroidetes;Sphingobacteriia;Sphingobacteriales;Sphingobacteriaceae;Pedobacter;             |
| 0.0003 | 0      | 0      | 0      | 0      | 0      | 0      | 0      | 0      | 0      | 0      | 0      | Bacteria;Proteobacteria;Gammaproteobacteria;Orbales;Orbaceae;Gilliamella;                              |
| 0      | 0.0002 | 0.0143 | 0      | 0.0001 | 0.0008 | 0      | 0.0003 | 0      | 0.0107 | 0      | 0.0009 | Bacteria;Cyanobacteria;Cyanobacteria;Synechococcales;Synechococcaceae;Cyanobium                        |
| 0      | 0      | 0      | 0      | 0      | 0      | 0      | 0      | 0      | 0      | 0      | 0      | Bacteria;Firmicutes;Clostridia;Clostridiales;Lachnospiraceae;Fusicatenibacter;                         |
| 0      | 0      | 0      | 0      | 0      | 0      | 0      | 0      | 0      | 0      | 0      | 0      | Bacteria;Proteobacteria;Gammaproteobacteria;Oceanospirillales;Halomonadaceae;Carnimonas;               |
| 0      | 0      | 0      | 0      | 0      | 0      | 0      | 0      | 0      | 0      | 0      | 0      | Bacteria;Proteobacteria;Gammaproteobacteria;Enterobacteriales;Enterobacteriaceae;Escherichia/Shigella; |
| 0      | 0      | 0      | 0      | 0      | 0      | 0      | 0      | 0      | 0      | 0      | 0      | Bacteria;Proteobacteria;Gammaproteobacteria;Enterobacteriales;Enterobacteriaceae;Citrobacter;          |
| 0      | 0      | 0      | 0      | 0      | 0      | 0      | 0      | 0      | 0      | 0      | 0      | Bacteria;Firmicutes;Bacilli;Lactobacillales;Streptococcaceae;Lactococcus;                              |
| 0      | 0      | 0      | 0      | 0      | 0      | 0      | 0      | 0      | 0      | 0.0245 | 0      | Bacteria;Proteobacteria;Alphaproteobacteria;Rhizobiales;Bradyrhizobiaceae;Bradyrhizobium;              |
| 0      | 0      | 0      | 0      | 0      | 0      | 0      | 0      | 0      | 0      | 0      | 0      | Bacteria;Bacteroidetes;Bacteroidia;Bacteroidales;Bacteroidaceae;Bacteroides;                           |
| 0      | 0      | 0      | 0      | 0      | 0      | 0      | 0      | 0      | 0      | 0      | 0      | Bacteria;Proteobacteria;Alphaproteobacteria;Rickettsiales;Rickettsiaceae;Rickettsia;                   |

|   |   |        |   |   |   |        |   |   |   |   |   |                                                                                                 |
|---|---|--------|---|---|---|--------|---|---|---|---|---|-------------------------------------------------------------------------------------------------|
| 0 | 0 | 0.0168 | 0 | 0 | 0 | 0      | 0 | 0 | 0 | 0 | 0 | Bacteria;Proteobacteria;Alphaproteobacteria;Rhodobacterales;Rhodobacteraceae;Actibacterium      |
| 0 | 0 | 0      | 0 | 0 | 0 | 0      | 0 | 0 | 0 | 0 | 0 | Bacteria;Proteobacteria;Betaproteobacteria;Neisseriales;Neisseriaceae;Snodgrassella;            |
| 0 | 0 | 0      | 0 | 0 | 0 | 0.0129 | 0 | 0 | 0 | 0 | 0 | Bacteria;Proteobacteria;Gammaproteobacteria;Enterobacteriales;Enterobacteriaceae;Pectobacterium |
| 0 | 0 | 0      | 0 | 0 | 0 | 0      | 0 | 0 | 0 | 0 | 0 | Bacteria;Proteobacteria;Alphaproteobacteria;Rhodospirillales;Acetobacteraceae;Neokomagataea;    |
| 0 | 0 | 0      | 0 | 0 | 0 | 0      | 0 | 0 | 0 | 0 | 0 | Bacteria;Proteobacteria;Gammaproteobacteria;Orbales;Orbaceae;Frischella;                        |
| 0 | 0 | 0      | 0 | 0 | 0 | 0      | 0 | 0 | 0 | 0 | 0 | Bacteria;Proteobacteria;Alphaproteobacteria;Rhizobiales;Bartonellaceae;Bartonella;              |
| 0 | 0 | 0      | 0 | 0 | 0 | 0      | 0 | 0 | 0 | 0 | 0 | Bacteria;Bacteroidetes;Flavobacteriia;Flavobacteriales;Flavobacteriaceae;Apidacter;             |
| 0 | 0 | 0      | 0 | 0 | 0 | 0      | 0 | 0 | 0 | 0 | 0 | Bacteria;Firmicutes;Bacilli;Bacillales;Staphylococcaceae;Staphylococcus;                        |
| 0 | 0 | 0      | 0 | 0 | 0 | 0      | 0 | 0 | 0 | 0 | 0 | Bacteria;Proteobacteria;Gammaproteobacteria;Oceanospirillales;Halomonadaceae;Halotalea;         |
| 0 | 0 | 0      | 0 | 0 | 0 | 0      | 0 | 0 | 0 | 0 | 0 | Bacteria;Bacteroidetes;Flavobacteriia;Flavobacteriales;Flavobacteriaceae;Flavobacterium;        |



**Table S3** Calculated relative abundance of all detected fungi in the samples

| F1H | F2H | F3H    | C1H | C2H | C3H | RT1H | RT2H   | RT3H   | W1H    | W2H    | W3H    | taxonomy                                                                                     |
|-----|-----|--------|-----|-----|-----|------|--------|--------|--------|--------|--------|----------------------------------------------------------------------------------------------|
| 1   | 1   | 0.8186 | 1   | 0.5 | 1   | 1    | 0.4711 | 0.7432 | 0.1104 | 0.1276 | 0.5791 | Fungi; Ascomycota; Dothideomycetes; Capnodiales; Cladosporiaceae; Cladosporium               |
| 0   | 0   | 0      | 0   | 0   | 0   | 0    | 0.3772 | 0      | 0      | 0      | 0      | Fungi; Ascomycota; Leotiomycetes; Erysiphales; Erysiphaceae; Podosphaera                     |
| 0   | 0   | 0      | 0   | 0   | 0   | 0    | 0      | 0      | 0      | 0      | 0      | Fungi; Ascomycota; Dothideomycetes; Capnodiales; Mycosphaerellaceae; Mycosphaerella          |
| 0   | 0   | 0      | 0   | 0   | 0   | 0    | 0.1517 | 0      | 0.8525 | 0.6914 | 0.3141 | Fungi; Ascomycota; Saccharomycetes; Saccharomycetales; Saccharomycetaceae; Zygosaccharomyces |
| 0   | 0   | 0      | 0   | 0   | 0   | 0    | 0      | 0      | 0      | 0      | 0      | Fungi; Ascomycota; Eurotiomycetes; Eurotiales; Aspergillaceae; Aspergillus                   |
| 0   | 0   | 0      | 0   | 0   | 0   | 0    | 0      | 0      | 0      | 0      | 0      | Fungi; Ascomycota; Eurotiomycetes; Eurotiales; Aspergillaceae; Penicillium                   |
| 0   | 0   | 0      | 0   | 0   | 0   | 0    | 0      | 0      | 0      | 0      | 0      | Fungi; Ascomycota; Saccharomycetes; Saccharomycetales; Metschnikowiaceae; Metschnikowia      |
| 0   | 0   | 0      | 0   | 0   | 0   | 0    | 0      | 0      | 0      | 0      | 0      | Fungi; Ascomycota; Sordariomycetes; Hypocreales; Nectriaceae; Fusarium                       |
| 0   | 0   | 0      | 0   | 0   | 0   | 0    | 0      | 0      | 0      | 0      | 0      | Fungi; Ascomycota; Dothideomycetes; Capnodiales; Mycosphaerellaceae; Ramularia               |
| 0   | 0   | 0      | 0   | 0   | 0   | 0    | 0      | 0      | 0      | 0      | 0      | Fungi; Ascomycota; Taphrinomycetes; Taphrinales; Taphrinaceae; Taphrina                      |
| 0   | 0   | 0      | 0   | 0   | 0   | 0    | 0      | 0      | 0      | 0      | 0      | Fungi; Ascomycota; Dothideomycetes; Pleosporales; Pleosporaceae; Alternaria                  |
| 0   | 0   | 0      | 0   | 0   | 0   | 0    | 0      | 0      | 0      | 0      | 0      | Fungi; Ascomycota; Dothideomycetes; Pleosporales; Didymellaceae; Didymella                   |
| 0   | 0   | 0      | 0   | 0   | 0   | 0    | 0      | 0      | 0      | 0      | 0      | Fungi; Ascomycota; Leotiomycetes; Thelebolales; Pseudoeurotiaceae; Bettisia                  |
| 0   | 0   | 0      | 0   | 0   | 0   | 0    | 0      | 0      | 0      | 0      | 0      | Fungi; Ascomycota; Leotiomycetes; Helotiales; Sclerotiniaceae; Monilinia                     |
| 0   | 0   | 0      | 0   | 0   | 0   | 0    | 0      | 0      | 0      | 0      | 0      | Fungi; Ascomycota; Dothideomycetes; Dothideales; Aureobasidiaceae; Aureobasidium             |
| 0   | 0   | 0      | 0   | 0   | 0   | 0    | 0      | 0      | 0      | 0      | 0      | Fungi; Ascomycota; Leotiomycetes; Helotiales; Helotiaceae; Tetracadium                       |
| 0   | 0   | 0      | 0   | 0   | 0   | 0    | 0      | 0      | 0      | 0      | 0      | Fungi; Ascomycota; Dothideomycetes; Pleosporales; Didymellaceae; Epicoccum                   |
| 0   | 0   | 0      | 0   | 0   | 0   | 0    | 0      | 0      | 0      | 0      | 0      | Fungi; Ascomycota; Eurotiomycetes; Chaetothyriales; Trichomeriaceae; Trichomerium            |
| 0   | 0   | 0      | 0   | 0   | 0   | 0    | 0      | 0      | 0      | 0      | 0      | Fungi; Ascomycota; Dothideomycetes; Pleosporales; Phaeosphaeriaceae; Pseudoophiobolus        |
| 0   | 0   | 0      | 0   | 0   | 0   | 0    | 0      | 0      | 0      | 0      | 0      | Fungi; Ascomycota; Leotiomycetes; Erysiphales; Erysiphaceae; Erysiphe                        |
| 0   | 0   | 0      | 0   | 0   | 0   | 0    | 0      | 0      | 0      | 0      | 0      | Fungi; Ascomycota; Dothideomycetes; Pleosporales; Pleosporaceae; Pyrenophora                 |
| 0   | 0   | 0      | 0   | 0   | 0   | 0    | 0      | 0      | 0      | 0      | 0      | Fungi; Ascomycota; Dothideomycetes; Dothideomycetes; incertae sedis ; Monodictys             |
| 0   | 0   | 0      | 0   | 0   | 0   | 0    | 0      | 0      | 0      | 0      | 0      | Fungi; Ascomycota; Leotiomycetes; Erysiphales; Erysiphaceae; Blumeria                        |
| 0   | 0   | 0      | 0   | 0   | 0   | 0    | 0      | 0      | 0      | 0      | 0      | Fungi; Ascomycota; Dothideomycetes; Capnodiales; Neodevriesiaceae; Neodevriesia              |
| 0   | 0   | 0      | 0   | 0   | 0   | 0    | 0      | 0      | 0      | 0      | 0      | Fungi; Ascomycota; Dothideomycetes; Pleosporales; Leptosphaeriaceae; Leptosphaeria           |
| 0   | 0   | 0      | 0   | 0   | 0   | 0    | 0      | 0      | 0      | 0      | 0      | Fungi; Ascomycota; Dothideomycetes; Capnodiales; Mycosphaerellaceae; Septoria                |

|   |   |        |   |     |   |   |   |        |        |        |        |                                                                                        |
|---|---|--------|---|-----|---|---|---|--------|--------|--------|--------|----------------------------------------------------------------------------------------|
| 0 | 0 | 0      | 0 | 0   | 0 | 0 | 0 | 0      | 0      | 0      | 0      | Fungi; Ascomycota; Dothideomycetes; Pleosporales; Phaeosphaeriaceae; Neosetophoma      |
| 0 | 0 | 0      | 0 | 0   | 0 | 0 | 0 | 0      | 0      | 0      | 0      | Fungi; Ascomycota; Dothideomycetes; Capnodiales; Phaeothecaceae; Phaeotheca            |
| 0 | 0 | 0      | 0 | 0   | 0 | 0 | 0 | 0      | 0      | 0      | 0      | Fungi; Ascomycota; Saccharomycetes; Saccharomycetales; Debaryomycetaceae; Debaryomyces |
| 0 | 0 | 0      | 0 | 0   | 0 | 0 | 0 | 0      | 0      | 0      | 0      | Fungi; Ascomycota; Dothideomycetes; Pleosporales; Melanommataceae; Alpinaria           |
| 0 | 0 | 0      | 0 | 0   | 0 | 0 | 0 | 0      | 0      | 0      | 0      | Fungi; Ascomycota; Dothideomycetes; Pleosporales; incertae sedis; Periconia            |
| 0 | 0 | 0      | 0 | 0   | 0 | 0 | 0 | 0      | 0      | 0      | 0      | Fungi; Ascomycota; Sordariomycetes; Hypocreales; Bionectriaceae; Geosmithia            |
| 0 | 0 | 0.1814 | 0 | 0.5 | 0 | 0 | 0 | 0.2568 | 0.0371 | 0.1809 | 0.1067 | Others                                                                                 |

| F1F    | F2F    | F3F    | C1F    | C2F    | C3F    | RT1F   | RT2F   | RT3F   | W1F    | W2F    | W3F    | taxonomy                                                                                     |
|--------|--------|--------|--------|--------|--------|--------|--------|--------|--------|--------|--------|----------------------------------------------------------------------------------------------|
| 0.5022 | 0.4722 | 0.3572 | 0.4118 | 0.3460 | 0.3924 | 0.4331 | 0.4817 | 0.3718 | 0.4458 | 0.4250 | 0.2067 | Fungi; Ascomycota; Dothideomycetes; Capnodiales; Cladosporiaceae; Cladosporium               |
| 0.0131 | 0.0139 | 0.0096 | 0.0085 | 0.0162 | 0.0061 | 0.0096 | 0.0142 | 0.0168 | 0.0108 | 0.0022 | 0.0022 | Fungi; Ascomycota; Leotiomyces; Erysiphales; Erysiphaceae; Podosphaera                       |
| 0.0630 | 0.0859 | 0.0524 | 0.0693 | 0.0779 | 0.0540 | 0.0641 | 0.0635 | 0.0765 | 0.0520 | 0.0772 | 0.0332 | Fungi; Ascomycota; Dothideomycetes; Capnodiales; Mycosphaerellaceae; Mycosphaerella          |
| 0      | 0      | 0      | 0      | 0      | 0      | 0      | 0      | 0      | 0.0072 | 0.0019 | 0.0006 | Fungi; Ascomycota; Saccharomycetes; Saccharomycetales; Saccharomycetaceae; Zygosaccharomyces |
| 0.0198 | 0.0113 | 0.0111 | 0.0086 | 0.0097 | 0.0067 | 0.0063 | 0.0056 | 0.0092 | 0.2364 | 0.2488 | 0.2407 | Fungi; Ascomycota; Eurotiomycetes; Eurotiales; Aspergillaceae; Aspergillus                   |
| 0.0288 | 0.0657 | 0.0347 | 0.0379 | 0.0200 | 0.0407 | 0.0546 | 0.0176 | 0.0607 | 0.0539 | 0.0110 | 0.1054 | Fungi; Ascomycota; Eurotiomycetes; Eurotiales; Aspergillaceae; Penicillium                   |
| 0.0094 | 0.0237 | 0.0391 | 0.0182 | 0.0167 | 0.0071 | 0.0250 | 0.0077 | 0.0152 | 0.0068 | 0.0124 | 0.0200 | Fungi; Ascomycota; Saccharomycetes; Saccharomycetales; Metschnikowiaceae; Metschnikowia      |
| 0.0376 | 0.0179 | 0.0511 | 0.0666 | 0.0592 | 0.0641 | 0.0658 | 0.1018 | 0.0863 | 0.0026 | 0.0301 | 0.0255 | Fungi; Ascomycota; Sordariomycetes; Hypocreales; Nectriaceae; Fusarium                       |
| 0.0199 | 0.0417 | 0.0349 | 0.0312 | 0.0365 | 0.0413 | 0.0251 | 0.0263 | 0.0360 | 0.0150 | 0.0099 | 0.0080 | Fungi; Ascomycota; Dothideomycetes; Capnodiales; Mycosphaerellaceae; Ramularia               |
| 0.0466 | 0.0398 | 0.0435 | 0.0518 | 0.0526 | 0.0425 | 0.0379 | 0.0327 | 0.0403 | 0.0168 | 0.0151 | 0.0098 | Fungi; Ascomycota; Taphrinomycetes; Taphrinales; Taphrinaceae; Taphrina                      |
| 0.0129 | 0.0172 | 0.0658 | 0.0236 | 0.0259 | 0.0279 | 0.0179 | 0.0429 | 0.0155 | 0.0139 | 0.0148 | 0.0054 | Fungi; Ascomycota; Dothideomycetes; Pleosporales; Pleosporaceae; Alternaria                  |
| 0.0249 | 0.0231 | 0.0577 | 0.0264 | 0.0652 | 0.0171 | 0.0514 | 0.0334 | 0.0402 | 0.0293 | 0.0071 | 0.0032 | Fungi; Ascomycota; Dothideomycetes; Pleosporales; Didymellaceae; Didymella                   |
| 0.0002 | 0.0067 | 0.0001 | 0.0000 | 0.0003 | 0.0080 | 0.0135 | 0.0007 | 0.0052 | 0.0000 | 0.0069 | 0.2684 | Fungi; Ascomycota; Leotiomyces; Thelebolales; Pseudeurotiaceae; Bettisia                     |
| 0.0144 | 0.0123 | 0.0220 | 0.0627 | 0.0576 | 0.0306 | 0.0261 | 0.0167 | 0.0126 | 0.0170 | 0.0061 | 0.0080 | Fungi; Ascomycota; Leotiomyces; Helotiales; Sclerotiniaceae; Monilinia                       |
| 0.0561 | 0.0218 | 0.0159 | 0.0125 | 0.0231 | 0.0144 | 0.0154 | 0.0407 | 0.0142 | 0.0205 | 0.0356 | 0.0117 | Fungi; Ascomycota; Dothideomycetes; Dothideales; Aureobasidiaceae; Aureobasidium             |
| 0.0255 | 0.0271 | 0.0298 | 0.0301 | 0.0266 | 0.0276 | 0.0344 | 0.0219 | 0.0354 | 0.0165 | 0.0291 | 0.0169 | Fungi; Ascomycota; Leotiomyces; Helotiales; Helotiaceae; Tetracladium                        |
| 0.0154 | 0.0127 | 0.0076 | 0.0117 | 0.0325 | 0.0049 | 0.0272 | 0.0021 | 0.0112 | 0.0013 | 0.0048 | 0.0031 | Fungi; Ascomycota; Dothideomycetes; Pleosporales; Didymellaceae; Epicoccum                   |
| 0.0218 | 0.0039 | 0.0169 | 0.0153 | 0.0142 | 0.0706 | 0.0167 | 0.0113 | 0.0178 | 0.0040 | 0.0037 | 0.0029 | Fungi; Ascomycota; Eurotiomycetes; Chaetothyriales; Trichomeriaceae; Trichomerium            |
| 0.0014 | 0.0004 | 0.0016 | 0.0015 | 0.0017 | 0.0011 | 0.0019 | 0.0010 | 0.0016 | 0.0004 | 0.0024 | 0.0008 | Fungi; Ascomycota; Dothideomycetes; Pleosporales; Phaeosphaeriaceae; Pseudoophiobolus        |
| 0.0090 | 0.0075 | 0.0067 | 0.0084 | 0.0083 | 0.0128 | 0.0053 | 0.0072 | 0.0135 | 0.0007 | 0.0021 | 0.0007 | Fungi; Ascomycota; Leotiomyces; Erysiphales; Erysiphaceae; Erysiphe                          |
| 0      | 0.0001 | 0      | 0      | 0      | 0      | 0      | 0.0022 | 0      | 0      | 0      | 0      | Fungi; Ascomycota; Dothideomycetes; Pleosporales; Pleosporaceae; Pyrenophora                 |
| 0.0007 | 0.0010 | 0.0017 | 0.0013 | 0.0008 | 0.0019 | 0.0002 | 0.0013 | 0.0003 | 0.0003 | 0.0026 | 0.0000 | Fungi; Ascomycota; Dothideomycetes; Dothideomycetes; incertae sedis ; Monodictys             |
| 0.0005 | 0.0022 | 0.0016 | 0.0043 | 0.0094 | 0.0090 | 0.0065 | 0.0039 | 0.0168 | 0.0017 | 0.0018 | 0.0010 | Fungi; Ascomycota; Leotiomyces; Erysiphales; Erysiphaceae; Blumeria                          |
| 0.0045 | 0.0090 | 0.0219 | 0.0062 | 0.0091 | 0.0094 | 0.0064 | 0.0024 | 0.0136 | 0.0017 | 0.0117 | 0.0011 | Fungi; Ascomycota; Dothideomycetes; Capnodiales; Neodevriesiaceae; Neodevriesia              |
| 0.0055 | 0.0026 | 0.0077 | 0.0019 | 0.0077 | 0.0036 | 0.0046 | 0.0043 | 0.0018 | 0.0067 | 0.0020 | 0.0056 | Fungi; Ascomycota; Dothideomycetes; Pleosporales; Leptosphaeriaceae; Leptosphaeria           |
| 0.0035 | 0.0019 | 0.0104 | 0.0027 | 0.0012 | 0.0035 | 0.0013 | 0.0012 | 0.0014 | 0.0020 | 0.0011 | 0.0006 | Fungi; Ascomycota; Dothideomycetes; Capnodiales; Mycosphaerellaceae; Septoria                |
| 0.0027 | 0.0023 | 0.0044 | 0.0021 | 0.0055 | 0.0026 | 0.0029 | 0.0026 | 0.0068 | 0.0108 | 0.0084 | 0.0012 | Fungi; Ascomycota; Dothideomycetes; Pleosporales; Phaeosphaeriaceae; Neosetophoma            |
| 0.0020 | 0.0136 | 0.0042 | 0.0091 | 0.0039 | 0.0061 | 0.0021 | 0.0015 | 0.0032 | 0.0052 | 0.0063 | 0.0024 | Fungi; Ascomycota; Dothideomycetes; Capnodiales; Phaeothecaceae; Phaeotheca                  |

|        |        |        |        |        |        |        |        |        |        |        |        |                                                                                        |
|--------|--------|--------|--------|--------|--------|--------|--------|--------|--------|--------|--------|----------------------------------------------------------------------------------------|
| 0.0010 | 0.0000 | 0.0000 | 0.0001 | 0.0002 | 0.0002 | 0.0001 | 0.0003 | 0.0000 | 0.0000 | 0.0003 | 0.0001 | Fungi; Ascomycota; Saccharomycetes; Saccharomycetales; Debaryomycetaceae; Debaryomyces |
| 0.0060 | 0.0026 | 0.0102 | 0.0005 | 0.0031 | 0.0263 | 0.0002 | 0.0034 | 0.0051 | 0.0004 | 0.0004 | 0.0005 | Fungi; Ascomycota; Dothideomycetes; Pleosporales; Melanommataceae; Alpinaria           |
| 0.0035 | 0.0032 | 0.0010 | 0.0039 | 0.0022 | 0.0107 | 0.0029 | 0.0043 | 0.0052 | 0.0014 | 0.0006 | 0.0006 | Fungi; Ascomycota; Dothideomycetes; Pleosporales; incertae sedis; Periconia            |
| 0      | 0      | 0      | 0.0001 | 0      | 0      | 0      | 0.0001 | 0.0001 | 0      | 0      | 0      | Fungi; Ascomycota; Sordariomycetes; Hypocreales; Bionectriaceae; Geosmithia            |
| 0.0480 | 0.0567 | 0.0791 | 0.0715 | 0.0669 | 0.0571 | 0.0416 | 0.0434 | 0.0657 | 0.0185 | 0.0184 | 0.0137 | Others                                                                                 |

| F1N    | F2N    | F3N    | C1N    | C2N    | C3N    | RT1N   | RT2N   | RT3N   | W1N    | W2N    | W3N    | taxonomy                                                                                     |
|--------|--------|--------|--------|--------|--------|--------|--------|--------|--------|--------|--------|----------------------------------------------------------------------------------------------|
| 0.2852 | 0.3448 | 0.1793 | 0.1398 | 0.2123 | 0.2065 | 0.2008 | 0.1668 | 0.1768 | 0.0903 | 0.1314 | 0.0748 | Fungi; Ascomycota; Dothideomycetes; Capnodiales; Cladosporiaceae; Cladosporium               |
| 0.0683 | 0.1524 | 0.6562 | 0.3044 | 0.2928 | 0.1976 | 0.0351 | 0.1154 | 0.1335 | 0.1401 | 0.1702 | 0.1557 | Fungi; Ascomycota; Leotiomyces; Erysiphales; Erysiphaceae; Podosphaera                       |
| 0.1677 | 0.0924 | 0.0531 | 0.1946 | 0.1863 | 0.0950 | 0.2535 | 0.1904 | 0.1741 | 0.0744 | 0.0930 | 0.0879 | Fungi; Ascomycota; Dothideomycetes; Capnodiales; Mycosphaerellaceae; Mycosphaerella          |
| 0.0002 | 0.0001 | 0.0001 | 0.0009 | 0.0005 | 0.0007 | 0.0095 | 0.0478 | 0.0193 | 0.5912 | 0.4577 | 0.4776 | Fungi; Ascomycota; Saccharomycetes; Saccharomycetales; Saccharomycetaceae; Zygosaccharomyces |
| 0.0021 | 0.0022 | 0.0005 | 0.0018 | 0.0020 | 0.0055 | 0.0007 | 0.0113 | 0.0042 | 0.0161 | 0.0268 | 0.0975 | Fungi; Ascomycota; Eurotiomycetes; Eurotiales; Aspergillaceae; Aspergillus                   |
| 0.0614 | 0.0108 | 0.0046 | 0.0118 | 0.0324 | 0.0257 | 0.0105 | 0.0113 | 0.0378 | 0.0010 | 0.0015 | 0.0018 | Fungi; Ascomycota; Eurotiomycetes; Eurotiales; Aspergillaceae; Penicillium                   |
| 0.0884 | 0.0768 | 0.0070 | 0.0133 | 0.0192 | 0.0407 | 0.0187 | 0.2069 | 0.0178 | 0.0218 | 0.0052 | 0.0104 | Fungi; Ascomycota; Saccharomycetes; Saccharomycetales; Metschnikowiaceae; Metschnikowia      |
| 0.0011 | 0.0124 | 0.0005 | 0.0024 | 0.0031 | 0.0086 | 0.0061 | 0.0019 | 0.0027 | 0.0041 | 0.0033 | 0.0013 | Fungi; Ascomycota; Sordariomycetes; Hypocreales; Nectriaceae; Fusarium                       |
| 0.0455 | 0.0188 | 0.0159 | 0.0208 | 0.0277 | 0.0289 | 0.0404 | 0.0212 | 0.0342 | 0.0067 | 0.0077 | 0.0069 | Fungi; Ascomycota; Dothideomycetes; Capnodiales; Mycosphaerellaceae; Ramularia               |
| 0.0296 | 0.0158 | 0.0084 | 0.0084 | 0.0077 | 0.0176 | 0.0159 | 0.0075 | 0.0116 | 0.0019 | 0.0213 | 0.0041 | Fungi; Ascomycota; Taphrinomycetes; Taphrinales; Taphrinaceae; Taphrina                      |
| 0.0565 | 0.0482 | 0.0046 | 0.0291 | 0.0322 | 0.0336 | 0.0290 | 0.0168 | 0.0274 | 0.0041 | 0.0081 | 0.0097 | Fungi; Ascomycota; Dothideomycetes; Pleosporales; Pleosporaceae; Alternaria                  |
| 0.0187 | 0.0197 | 0.0118 | 0.0045 | 0.0089 | 0.0298 | 0.0185 | 0.0056 | 0.0139 | 0.0043 | 0.0183 | 0.0063 | Fungi; Ascomycota; Dothideomycetes; Pleosporales; Didymellaceae; Didymella                   |
| 0.0004 | 0.0004 | 0.0002 | 0      | 0      | 0.0035 | 0.0050 | 0      | 0.1537 | 0.0001 | 0.0001 | 0.0000 | Fungi; Ascomycota; Leotiomyces; Thelebolales; Pseudeurotiaceae; Bettsia                      |
| 0.0209 | 0.0279 | 0.0095 | 0.0364 | 0.0320 | 0.0228 | 0.0141 | 0.0176 | 0.0382 | 0.0058 | 0.0047 | 0.0028 | Fungi; Ascomycota; Leotiomyces; Helotiales; Sclerotiniaceae; Monilinia                       |
| 0.0126 | 0.0122 | 0.0033 | 0.0054 | 0.0074 | 0.0224 | 0.0104 | 0.0047 | 0.0071 | 0.0021 | 0.0035 | 0.0022 | Fungi; Ascomycota; Dothideomycetes; Dothideales; Aureobasidiaceae; Aureobasidium             |
| 0.0050 | 0.0019 | 0.0007 | 0.0032 | 0.0013 | 0.0033 | 0.0033 | 0.0025 | 0.0056 | 0.0019 | 0.0020 | 0.0025 | Fungi; Ascomycota; Leotiomyces; Helotiales; Helotiaceae; Tetracladium                        |
| 0.0083 | 0.0039 | 0.0026 | 0.0178 | 0.0050 | 0.0053 | 0.0312 | 0.0040 | 0.0385 | 0.0028 | 0.0044 | 0.0034 | Fungi; Ascomycota; Dothideomycetes; Pleosporales; Didymellaceae; Epicoccum                   |
| 0.0084 | 0.0054 | 0.0011 | 0.0009 | 0.0014 | 0.0145 | 0.0012 | 0.0008 | 0.0026 | 0.0004 | 0.0018 | 0.0007 | Fungi; Ascomycota; Eurotiomycetes; Chaetothyriales; Trichomeriaceae; Trichomerium            |
| 0.0027 | 0.0075 | 0.0006 | 0.0079 | 0.0036 | 0.0050 | 0.1845 | 0.0032 | 0.0061 | 0.0017 | 0.0010 | 0.0016 | Fungi; Ascomycota; Dothideomycetes; Pleosporales; Phaeosphaeriaceae; Pseudoophiobolus        |
| 0.0221 | 0.0098 | 0.0049 | 0.0080 | 0.0138 | 0.0122 | 0.0187 | 0.0060 | 0.0075 | 0.0011 | 0.0024 | 0.0028 | Fungi; Ascomycota; Leotiomyces; Erysiphales; Erysiphaceae; Erysiphe                          |
| 0      | 0.0084 | 0      | 0.1139 | 0.0192 | 0      | 0.0019 | 0.0220 | 0.0006 | 0      | 0.0007 | 0.0011 | Fungi; Ascomycota; Dothideomycetes; Pleosporales; Pleosporaceae; Pyrenophora                 |
| 0.0171 | 0.0041 | 0.0013 | 0.0088 | 0.0106 | 0.0830 | 0.0088 | 0.0092 | 0.0060 | 0.0010 | 0.0027 | 0.0046 | Fungi; Ascomycota; Dothideomycetes; Dothideomycetes; incertae sedis ; Monodictys             |
| 0.0045 | 0.0282 | 0.0004 | 0.0054 | 0.0062 | 0.0036 | 0.0055 | 0.0061 | 0.0029 | 0.0017 | 0.0025 | 0.0236 | Fungi; Ascomycota; Leotiomyces; Erysiphales; Erysiphaceae; Blumeria                          |
| 0.0013 | 0.0022 | 0.0006 | 0.0003 | 0.0000 | 0.0021 | 0.0004 | 0.0004 | 0.0005 | 0.0006 | 0.0002 | 0.0002 | Fungi; Ascomycota; Dothideomycetes; Capnodiales; Neodevriesiaceae; Neodevriesia              |
| 0.0075 | 0.0039 | 0.0008 | 0.0008 | 0.0017 | 0.0089 | 0.0016 | 0.0012 | 0.0021 | 0.0007 | 0.0007 | 0.0006 | Fungi; Ascomycota; Dothideomycetes; Pleosporales; Leptosphaeriaceae; Leptosphaeria           |
| 0.0050 | 0.0050 | 0.0017 | 0.0024 | 0.0035 | 0.0093 | 0.0132 | 0.0033 | 0.0030 | 0.0017 | 0.0026 | 0.0009 | Fungi; Ascomycota; Dothideomycetes; Capnodiales; Mycosphaerellaceae; Septoria                |
| 0.0015 | 0.0043 | 0.0008 | 0.0020 | 0.0005 | 0.0050 | 0.0026 | 0.0004 | 0.0061 | 0.0015 | 0.0019 | 0.0001 | Fungi; Ascomycota; Dothideomycetes; Pleosporales; Phaeosphaeriaceae; Neosetophoma            |
| 0.0027 | 0.0030 | 0.0009 | 0.0026 | 0.0002 | 0.0037 | 0.0011 | 0.0004 | 0.0009 | 0.0005 | 0.0003 | 0.0003 | Fungi; Ascomycota; Dothideomycetes; Capnodiales; Phaeothecaceae; Phaeotheca                  |

|        |        |        |        |        |        |        |        |        |        |        |        |                                                                                        |
|--------|--------|--------|--------|--------|--------|--------|--------|--------|--------|--------|--------|----------------------------------------------------------------------------------------|
| 0.0070 | 0.0082 | 0.0019 | 0.0113 | 0.0113 | 0.0074 | 0.0076 | 0.0097 | 0.0044 | 0.0005 | 0.0005 | 0.0023 | Fungi; Ascomycota; Saccharomycetes; Saccharomycetales; Debaryomycetaceae; Debaryomyces |
| 0      | 0      | 0.0000 | 0.0007 | 0      | 0      | 0      | 0.0003 | 0.0000 | 0.0001 | 0.0002 | 0      | Fungi; Ascomycota; Dothideomycetes; Pleosporales; Melanommataceae; Alpinaria           |
| 0.0008 | 0.0025 | 0.0001 | 0.0004 | 0.0016 | 0.0012 | 0.0006 | 0.0001 | 0.0043 | 0.0037 | 0.0006 | 0.0004 | Fungi; Ascomycota; Dothideomycetes; Pleosporales; incertae sedis; Periconia            |
| 0.0002 | 0.0015 | 0.0001 | 0.0000 | 0.0011 | 0.0271 | 0.0001 | 0.0362 | 0.0027 | 0      | 0.0001 | 0      | Fungi; Ascomycota; Sordariomycetes; Hypocreales; Bionectriaceae; Geosmithia            |
| 0.0475 | 0.0655 | 0.0264 | 0.0400 | 0.0543 | 0.0697 | 0.0496 | 0.0688 | 0.0536 | 0.0162 | 0.0227 | 0.0157 | Others                                                                                 |

**Table S4** Calculated relative abundance of bacterial composition (> 10%) between different storage conditions

| F1H    | F2H    | F3H    | C1H    | C2H    | C3H    | RT1H   | RT2H   | W1H     | W2H     | W3H     | taxonomy                                                                                         |
|--------|--------|--------|--------|--------|--------|--------|--------|---------|---------|---------|--------------------------------------------------------------------------------------------------|
| 0.4335 | 0.6673 | 0.8104 | 0.5924 | 0.7750 | 0.6638 | 0.8669 | 0.9062 | 0.52483 | 0.07480 | 0.54757 | Bacteria;Firmicutes;Bacilli;Lactobacillales;Lactobacillaceae;Lactobacillus;                      |
| 0.1430 | 0.0173 | 0.0255 | 0.0070 | 0.0255 | 0.0864 | 0.0149 | 0.0067 | 0.00106 | 0       | 0.01743 | Bacteria;Proteobacteria;Gammaproteobacteria;Pseudomonadales;Pseudomonadaceae;Pseudomonas;        |
| 0.0256 | 0.0505 | 0.0043 | 0.2206 | 0.0079 | 0.0834 | 0.0022 | 0.0033 | 0.02460 | 0.02002 | 0.20771 | Bacteria;Proteobacteria;Gammaproteobacteria;Pseudomonadales;Moraxellaceae;Acinetobacter;         |
| 0.1204 | 0.0038 | 0.0084 | 0.0041 | 0.0025 | 0.0064 | 0.0976 | 0.0012 | 0       | 0       | 0.03213 | Bacteria;Proteobacteria;Gammaproteobacteria;Enterobacteriales;Enterobacteriaceae;Rosenbergiella; |
| 0.0124 | 0.0117 | 0.0053 | 0.0014 | 0.0032 | 0.0045 | 0.0001 | 0.0006 | 0.32299 | 0.75366 | 0.06831 | Bacteria;Actinobacteria;Actinobacteria;Actinomycetales;Micrococcaceae;Arthrobacter;              |
| 0.2651 | 0.2494 | 0.1462 | 0.1746 | 0.1858 | 0.1554 | 0.0182 | 0.0821 | 0.12653 | 0.15152 | 0.12685 | Others                                                                                           |

| F1F    | F2F    | F3F    | C1F    | C2F    | C3F    | RT1F   | RT2F   | RT3F   | W1F    | W2F    | W3F    | taxonomy                                                                                         |
|--------|--------|--------|--------|--------|--------|--------|--------|--------|--------|--------|--------|--------------------------------------------------------------------------------------------------|
| 0.5824 | 0.8154 | 0.7050 | 0.7270 | 0.4291 | 0.6423 | 0.5668 | 0.5939 | 0.6394 | 0.9061 | 0.5689 | 0.8142 | Bacteria;Firmicutes;Bacilli;Lactobacillales;Lactobacillaceae;Lactobacillus;                      |
| 0.1086 | 0.0126 | 0.0356 | 0.0557 | 0.1557 | 0.1447 | 0.1173 | 0.1578 | 0.1004 | 0.0211 | 0.0641 | 0.0277 | Bacteria;Proteobacteria;Gammaproteobacteria;Pseudomonadales;Pseudomonadaceae;Pseudomonas;        |
| 0.0233 | 0.0041 | 0.0137 | 0.0192 | 0.0062 | 0.0046 | 0.0398 | 0.0150 | 0.0285 | 0.0005 | 0.1711 | 0.0076 | Bacteria;Proteobacteria;Gammaproteobacteria;Pseudomonadales;Moraxellaceae;Acinetobacter;         |
| 0.1586 | 0.0390 | 0.1071 | 0.0515 | 0.0477 | 0.0603 | 0.1209 | 0.0730 | 0.0275 | 0.0275 | 0.0572 | 0.0423 | Bacteria;Proteobacteria;Gammaproteobacteria;Enterobacteriales;Enterobacteriaceae;Rosenbergiella; |
| 0      | 0      | 0      | 0      | 0      | 0      | 0      | 0      | 0      | 0      | 0      | 0      | Bacteria;Actinobacteria;Actinobacteria;Actinomycetales;Micrococcaceae;Arthrobacter;              |
| 0.1271 | 0.1288 | 0.1387 | 0.1466 | 0.3613 | 0.1481 | 0.1551 | 0.1604 | 0.2042 | 0.0448 | 0.1387 | 0.1081 | Others                                                                                           |

| F1N    | F2N    | F3N    | C1N    | C2N    | C3N    | RT1N   | RT2N   | RT3N   | W1N    | W2N    | W3N    | taxonomy                                                                                         |
|--------|--------|--------|--------|--------|--------|--------|--------|--------|--------|--------|--------|--------------------------------------------------------------------------------------------------|
| 0.0479 | 0.0035 | 0.0143 | 0.0459 | 0.0570 | 0.0135 | 0.0015 | 0.0062 | 0.0524 | 0.0348 | 0.0273 | 0.0045 | Bacteria;Firmicutes;Bacilli;Lactobacillales;Lactobacillaceae;Lactobacillus;                      |
| 0.3984 | 0.1424 | 0.5023 | 0.3574 | 0.5189 | 0.3670 | 0.2967 | 0.2924 | 0.4553 | 0.1264 | 0.4771 | 0.2746 | Bacteria;Proteobacteria;Gammaproteobacteria;Pseudomonadales;Pseudomonadaceae;Pseudomonas;        |
| 0.2276 | 0.2436 | 0.1581 | 0.1220 | 0.1436 | 0.1489 | 0.2432 | 0.1671 | 0.0531 | 0.3207 | 0.0647 | 0.3570 | Bacteria;Proteobacteria;Gammaproteobacteria;Pseudomonadales;Moraxellaceae;Acinetobacter;         |
| 0.0617 | 0.3576 | 0.0128 | 0.0267 | 0.0121 | 0.0183 | 0.1409 | 0.0250 | 0.0128 | 0.0723 | 0.0066 | 0.0719 | Bacteria;Proteobacteria;Gammaproteobacteria;Enterobacteriales;Enterobacteriaceae;Rosenbergiella; |
| 0      | 0      | 0      | 0      | 0      | 0      | 0      | 0      | 0      | 0      | 0      | 0      | Bacteria;Actinobacteria;Actinobacteria;Actinomycetales;Micrococcaceae;Arthrobacter;              |
| 0.2645 | 0.2529 | 0.3124 | 0.4480 | 0.2684 | 0.4523 | 0.3177 | 0.5093 | 0.4263 | 0.4458 | 0.4243 | 0.2920 | Others                                                                                           |

**Table S5** Calculated relative abundance of fungal composition (> 10%) between different storage conditions

| F1H | F2H | F3H    | C1H | C2H | C3H | RT1H | RT2H   | RT3H   | W1H    | W2H    | W3H    | taxonomy                                                                                     |
|-----|-----|--------|-----|-----|-----|------|--------|--------|--------|--------|--------|----------------------------------------------------------------------------------------------|
| 1   | 1   | 0.8186 | 1   | 0.5 | 1   | 1    | 0.4711 | 0.7432 | 0.1104 | 0.1276 | 0.5791 | Fungi; Ascomycota; Dothideomycetes; Capnodiales; Cladosporiaceae; Cladosporium               |
| 0   | 0   | 0      | 0   | 0   | 0   | 0    | 0.3772 | 0      | 0      | 0      | 0      | Fungi; Ascomycota; Leotiomyces; Erysiphales; Erysiphaceae; Podosphaera                       |
| 0   | 0   | 0      | 0   | 0   | 0   | 0    | 0      | 0      | 0      | 0      | 0      | Fungi; Ascomycota; Dothideomycetes; Capnodiales; Mycosphaerellaceae; Mycosphaerella          |
| 0   | 0   | 0      | 0   | 0   | 0   | 0    | 0.1517 | 0      | 0.8525 | 0.6914 | 0.3141 | Fungi; Ascomycota; Saccharomycetes; Saccharomycetales; Saccharomycetaceae; Zygosaccharomyces |
| 0   | 0   | 0      | 0   | 0   | 0   | 0    | 0      | 0      | 0      | 0      | 0      | Fungi; Ascomycota; Eurotiomycetes; Eurotiales; Aspergillaceae; Aspergillus                   |
| 0   | 0   | 0.1814 | 0   | 0.5 | 0   | 0    | 0      | 0.2568 | 0.0371 | 0.1809 | 0.1067 | Others                                                                                       |

| F1F    | F2F    | F3F    | C1F    | C2F    | C3F    | RT1F   | RT2F   | RT3F   | W1F    | W2F    | W3F    | taxonomy                                                                                     |
|--------|--------|--------|--------|--------|--------|--------|--------|--------|--------|--------|--------|----------------------------------------------------------------------------------------------|
| 0.5022 | 0.4722 | 0.3572 | 0.4118 | 0.3460 | 0.3924 | 0.4331 | 0.4817 | 0.3718 | 0.4458 | 0.4250 | 0.2067 | Fungi; Ascomycota; Dothideomycetes; Capnodiales; Cladosporiaceae; Cladosporium               |
| 0.0131 | 0.0139 | 0.0096 | 0.0085 | 0.0162 | 0.0061 | 0.0096 | 0.0142 | 0.0168 | 0.0108 | 0.0022 | 0.0022 | Fungi; Ascomycota; Leotiomyces; Erysiphales; Erysiphaceae; Podosphaera                       |
| 0.0630 | 0.0859 | 0.0524 | 0.0693 | 0.0779 | 0.0540 | 0.0641 | 0.0635 | 0.0765 | 0.0520 | 0.0772 | 0.0332 | Fungi; Ascomycota; Dothideomycetes; Capnodiales; Mycosphaerellaceae; Mycosphaerella          |
| 0      | 0      | 0      | 0      | 0      | 0      | 0      | 0      | 0      | 0.0072 | 0.0019 | 0.0006 | Fungi; Ascomycota; Saccharomycetes; Saccharomycetales; Saccharomycetaceae; Zygosaccharomyces |
| 0.0198 | 0.0113 | 0.0111 | 0.0086 | 0.0097 | 0.0067 | 0.0063 | 0.0056 | 0.0092 | 0.2364 | 0.2488 | 0.2407 | Fungi; Ascomycota; Eurotiomycetes; Eurotiales; Aspergillaceae; Aspergillus                   |
| 0.4019 | 0.4166 | 0.5697 | 0.5018 | 0.5502 | 0.5409 | 0.4869 | 0.4351 | 0.5256 | 0.2477 | 0.2449 | 0.5166 | Others                                                                                       |

| F1N    | F2N    | F3N    | C1N    | C2N    | C3N    | RT1N   | RT2N   | RT3N   | W1N    | W2N    | W3N    | taxonomy                                                                                     |
|--------|--------|--------|--------|--------|--------|--------|--------|--------|--------|--------|--------|----------------------------------------------------------------------------------------------|
| 0.2852 | 0.3448 | 0.1793 | 0.1398 | 0.2123 | 0.2065 | 0.2008 | 0.1668 | 0.1768 | 0.0903 | 0.1314 | 0.0748 | Fungi; Ascomycota; Dothideomycetes; Capnodiales; Cladosporiaceae; Cladosporium               |
| 0.0683 | 0.1524 | 0.6562 | 0.3044 | 0.2928 | 0.1976 | 0.0351 | 0.1154 | 0.1335 | 0.1401 | 0.1702 | 0.1557 | Fungi; Ascomycota; Leotiomyces; Erysiphales; Erysiphaceae; Podosphaera                       |
| 0.1677 | 0.0924 | 0.0531 | 0.1946 | 0.1863 | 0.0950 | 0.2535 | 0.1904 | 0.1741 | 0.0744 | 0.0930 | 0.0879 | Fungi; Ascomycota; Dothideomycetes; Capnodiales; Mycosphaerellaceae; Mycosphaerella          |
| 0.0002 | 0.0001 | 0.0001 | 0.0009 | 0.0005 | 0.0007 | 0.0095 | 0.0478 | 0.0193 | 0.5912 | 0.4577 | 0.4776 | Fungi; Ascomycota; Saccharomycetes; Saccharomycetales; Saccharomycetaceae; Zygosaccharomyces |
| 0.0021 | 0.0022 | 0.0005 | 0.0018 | 0.0020 | 0.0055 | 0.0007 | 0.0113 | 0.0042 | 0.0161 | 0.0268 | 0.0975 | Fungi; Ascomycota; Eurotiomycetes; Eurotiales; Aspergillaceae; Aspergillus                   |
| 0.4766 | 0.4080 | 0.1109 | 0.3584 | 0.3061 | 0.4949 | 0.5004 | 0.4683 | 0.4921 | 0.0878 | 0.1209 | 0.1064 | Others                                                                                       |



**Table S6** Results of statistical analysis 1 (GLM) for bacterial genera in Dataset 2 (additionally Dataset 1) (> 10%)

| <b>GLM (Dataset 2-2019 (F and N))</b> | <b>df1</b> | <b>df2</b> | <b>F.ratio</b> | <b>p.value</b> |
|---------------------------------------|------------|------------|----------------|----------------|
| <b>Lactobacillus</b>                  |            |            |                |                |
| Location                              | 1          | Inf        | 524.107        | <0.0001        |
| Storage condition                     | 3          | Inf        | 2.792          | 0.0388         |
| Location:Storage condition            | 3          | Inf        | 3.014          | 0.0187         |
|                                       |            |            |                |                |
| <b>Pseudomonas</b>                    |            |            |                |                |
| Location                              | 1          | Inf        | 61.793         | <0.0001        |
| Storage condition                     | 3          | Inf        | 2.303          | 0.0748         |
| Location:Storage condition            | 3          | Inf        | 0.338          | 0.798          |
|                                       |            |            |                |                |
| <b>Acinetobacter</b>                  |            |            |                |                |
| Location                              | 1          | Inf        | 43.311         | <0.0001        |
| Storage condition                     | 3          | Inf        | 0.602          | 0.6138         |
| Location:Storage condition            | 3          | Inf        | 0.916          | 0.4319         |
|                                       |            |            |                |                |
| <b>Rosenbergiella</b>                 |            |            |                |                |
| Location                              | 1          | Inf        | 1.249          | 0.2637         |
| Storage condition                     | 3          | Inf        | 0.954          | 0.4132         |
| Location:Storage condition            | 3          | Inf        | 0.132          | 0.941          |

| <b>GLM (Dataset 1&amp;2- 2018&amp;2019 (H, F and N))</b> | <b>df1</b> | <b>df2</b> | <b>F.ratio</b> | <b>p.value</b> |
|----------------------------------------------------------|------------|------------|----------------|----------------|
| <b>Lactobacillus</b>                                     |            |            |                |                |
| Location                                                 | 2          | Inf        | 260.289        | <0.0001        |
| Storage condition                                        | 3          | Inf        | 2.378          | 0.0677         |
| Location:Storage condition                               | 6          | Inf        | 7.032          | <0.0001        |
|                                                          |            |            |                |                |
| <b>Pseudomonas</b>                                       |            |            |                |                |
| Location                                                 | 2          | Inf        | 62.422         | <0.0001        |
| Storage condition                                        | 3          | Inf        | 2.85           | 0.0359         |
| Location:Storage condition                               | 6          | Inf        | 1.296          | 0.2551         |
|                                                          |            |            |                |                |
| <b>Acinetobacter</b>                                     |            |            |                |                |
| Location                                                 | 2          | Inf        | 18.475         | <0.0001        |
| Storage condition                                        | 3          | Inf        | 0.667          | 0.5724         |
| Location:Storage condition                               | 6          | Inf        | 1.096          | 0.3616         |
|                                                          |            |            |                |                |
| <b>Rosenbergiella</b>                                    |            |            |                |                |
| Location                                                 | 2          | Inf        | 7.616          | 0.0005         |
| Storage condition                                        | 3          | Inf        | 1.266          | 0.2842         |
| Location:Storage condition                               | 6          | Inf        | 0.214          | 0.9724         |
|                                                          |            |            |                |                |
| <b>Arthrobacter</b>                                      |            |            |                |                |
| Location                                                 | 2          | Inf        | 9.421          | 0.0001         |
| Storage condition                                        | 3          | Inf        | 5.425          | 0.001          |
| Location:Storage condition                               | 6          | Inf        | 2.821          | 0.0096         |

**Table S7** Results of statistical analysis 2 (Tukey Test) for bacterial genera in Dataset 2 (additionally Dataset 1) (> 10%)

| <b>Tukey Test (Dataset 2-2019 (F and N))</b> | estimate | SE     | df  | z.ratio | p.value |
|----------------------------------------------|----------|--------|-----|---------|---------|
| <b>Lactobacillus</b>                         |          |        |     |         |         |
| cold-fresh                                   | -0.0404  | 0.0396 | Inf | -1.02   | 0.7378  |
| cold-room temp                               | 0.0157   | 0.0407 | Inf | 0.386   | 0.9805  |
| cold-warm                                    | -0.0815  | 0.038  | Inf | -0.2145 | 0.1391  |
| fresh-room temp                              | 0.0561   | 0.0387 | Inf | 1.45    | 0.4683  |
| fresh-warm                                   | -0.0412  | 0.0358 | Inf | -1.15   | 0.6587  |
| room temp-warm                               | -0.0972  | 0.0371 | Inf | -2.623  | 0.0432  |

| <b>Tukey Test (Dataset 1&amp;2-2018&amp;2019 (H, F and N))</b> | estimate | SE      | df  | z.ratio | p.value |
|----------------------------------------------------------------|----------|---------|-----|---------|---------|
| <b>Lactobacillus</b>                                           |          |         |     |         |         |
| F-H                                                            | 0.0381   | 0.0463  | Inf | 0.822   | 0.6892  |
| F-N                                                            | 0.6235   | 0.0356  | Inf | 17.516  | <0.0001 |
| H-N                                                            | 0.5854   | 0.0348  | Inf | 16.828  | <0.0001 |
| <b>Pseudomonas</b>                                             |          |         |     |         |         |
| cold-fresh                                                     | 0.0464   | 0.0309  | Inf | 1.505   | 0.4347  |
| cold-room temp                                                 | 0.0338   | 0.0321  | Inf | 0.71    | 0.893   |
| cold-warm                                                      | 0.0806   | 0.0294  | Inf | 2.745   | 0.0308  |
| fresh-room temp                                                | -0.0236  | 0.0305  | Inf | -0.773  | 0.8667  |
| fresh-warm                                                     | 0.0342   | 0.0276  | Inf | 1.237   | 0.603   |
| room temp-warm                                                 | 0.0578   | 0.029   | Inf | 1.99    | 0.1917  |
| F-H                                                            | 0.0575   | 0.0172  | Inf | 3.339   | 0.0024  |
| F-N                                                            | -0.2525  | 0.0307  | Inf | -8.223  | <0.0001 |
| H-N                                                            | -0.3099  | 0.0281  | Inf | -11.047 | <0.0001 |
| <b>Acinetobacter</b>                                           |          |         |     |         |         |
| F-H                                                            | -0.0178  | 0.0143  | Inf | -1.246  | 0.436   |
| F-N                                                            | -0.01549 | 0.0255  | Inf | -6.078  | <0.0001 |
| H-N                                                            | -0.01371 | 0.0268  | Inf | -5.12   | <0.0001 |
| <b>Rosenbergiella</b>                                          |          |         |     |         |         |
| F-H                                                            | 0.0568   | 0.0165  | Inf | 3.445   | 0.0017  |
| F-N                                                            | 0.0212   | 0.0194  | Inf | 1.094   | 0.5175  |
| H-N                                                            | -0.0356  | 0.0142  | Inf | -2.513  | 0.0321  |
| <b>Arthrobacter</b>                                            |          |         |     |         |         |
| cold-fresh                                                     | -0.00407 | 0.00993 | Inf | -0.41   | 0.9767  |
| cold-room temp                                                 | 0.00351  | 0.00812 | Inf | 0.432   | 0.9729  |
| cold-warm                                                      | -0.10362 | 0.0269  | Inf | -3.853  | 0.0007  |
| fresh-room temp                                                | 0.00758  | 0.00949 | Inf | 0.799   | 0.8548  |
| fresh-warm                                                     | -0.09955 | 0.02733 | Inf | -3.642  | 0.0015  |
| room temp-warm                                                 | -0.10713 | 0.02671 | Inf | -4.012  | 0.0004  |
| F-H                                                            | -0.0908  | 0.0211  | Inf | -4.302  | 0.0001  |
| F-N                                                            | 0        | 0.0056  | Inf | 0       | 1       |
| H-N                                                            | 0.0908   | 0.0211  | Inf | 4.302   | 0.0001  |

**Table S8** Results of statistical analysis 1 (GLM) for fungal genera in Dataset 2 (> 10%)

| <b>GLM (Dataset 2-2019 (F and N))</b> | df1 | df2 | Fratio  | p.value |
|---------------------------------------|-----|-----|---------|---------|
| <b>Cladosporium</b>                   |     |     |         |         |
| Location                              | 1   | lnf | 95.146  | <0.0001 |
| Storage condition                     | 3   | lnf | 6.009   | 0.0004  |
| Location:Storage condition            | 3   | lnf | 0.642   | 0.5879  |
|                                       |     |     |         |         |
| <b>Podoshaera</b>                     |     |     |         |         |
| Location                              | 1   | lnf | 40.318  | <0.0001 |
| Storage condition                     | 3   | lnf | 2.218   | 0.0837  |
| Location:Storage condition            | 3   | lnf | 2.389   | 0.0668  |
|                                       |     |     |         |         |
| <b>Mycosphaerella</b>                 |     |     |         |         |
| Location                              | 1   | lnf | 45.613  | <0.0001 |
| Storage condition                     | 3   | lnf | 8.078   | <0.0001 |
| Location:Storage condition            | 3   | lnf | 5.337   | 0.0011  |
|                                       |     |     |         |         |
| <b>Zygosaccharomyces</b>              |     |     |         |         |
| Location                              | 1   | lnf | 643.042 | <0.0001 |
| Storage condition                     | 3   | lnf | 221.964 | <0.0001 |
| Location:Storage condition            | 3   | lnf | 217.176 | <0.0001 |
|                                       |     |     |         |         |
| <b>Aspergillus</b>                    |     |     |         |         |
| Location                              | 1   | lnf | 139.089 | <0.0001 |
| Storage condition                     | 3   | lnf | 72.087  | <0.0001 |
| Location:Storage condition            | 3   | lnf | 41.366  | <0.0001 |

**Table S9** Results of statistical analysis 2 (Tukey Test) for fungal genera in Dataset 2 (> 10%)

| <b>Tukey Test (Dataset 2-2019 (F and N))</b> | estimate   | SE       | df  | zratio  | p.value |
|----------------------------------------------|------------|----------|-----|---------|---------|
| <b>Cladosporium</b>                          |            |          |     |         |         |
| cold-fresh                                   | -0.0688    | 0.0325   | Inf | -2.114  | 0.1486  |
| cold-room temp                               | -0.021     | 0.0316   | Inf | -0.664  | 0.9106  |
| cold-warm                                    | 0.0595     | 0.0299   | Inf | 1.988   | 0.1926  |
| fresh-room temp                              | 0.0478     | 0.0327   | Inf | 1.463   | 0.46    |
| fresh-warm                                   | 0.1283     | 0.0311   | Inf | 4.126   | 0.0002  |
| room temp-warm                               | 0.0808     | 0.0301   | Inf | 2.675   | 0.0375  |
|                                              |            |          |     |         |         |
| <b>Mycosphaerella</b>                        |            |          |     |         |         |
| cold-fresh                                   | 0.0288     | 0.0146   | Inf | 1.968   | 0.2     |
| cold-room temp                               | -0.0263    | 0.0163   | Inf | -1.621  | 0.3667  |
| cold-warm                                    | 0.041      | 0.0142   | Inf | 2.893   | 0.0199  |
| fresh-room temp                              | -0.0552    | 0.0154   | Inf | -3.589  | 0.0019  |
| fresh-warm                                   | 0.0122     | 0.0132   | Inf | 0.927   | 0.7903  |
| room temp-warm                               | 0.0674     | 0.0149   | Inf | 4.512   | <0.0001 |
|                                              |            |          |     |         |         |
| <b>Zygosaccharomyces</b>                     |            |          |     |         |         |
| cold-fresh                                   | 0.000471   | 0.000884 | Inf | 0.533   | 0.9511  |
| cold-room temp                               | -0.010296  | 0.002941 | Inf | -3.499  | 0.0026  |
| cold-warm                                    | -0.254761  | 0.009996 | Inf | -25.485 | <0.0001 |
| fresh-room temp                              | -0.010767  | 0.002908 | Inf | -3.702  | 0.0012  |
| fresh-warm                                   | -0.255232  | 0.009985 | Inf | -25.562 | <0.0001 |
| room temp-warm                               | -0.244466  | 0.010374 | Inf | -23.565 | <0.0001 |
|                                              |            |          |     |         |         |
| <b>Aspergillus</b>                           |            |          |     |         |         |
| cold-fresh                                   | -0.001901  | 0.0031   | Inf | -0.613  | 0.9279  |
| cold-room temp                               | 0.000427   | 0.00281  | Inf | 0.152   | 0.9987  |
| cold-warm                                    | -0.132687  | 0.00916  | Inf | -14.488 | <0.0001 |
| fresh-room temp                              | 0.002328   | 0.00305  | Inf | 0.764   | 0.8708  |
| fresh-warm                                   | -0.0130785 | 0.00925  | Inf | -14.161 | <0.0001 |
| room temp-warm                               | -0.0133114 | 0.00914  | Inf | -14.562 | <0.0001 |

**Figure S1** Location area of sampling in Southern Germany, Baden-Wuerttemberg with different colors showing the different altitude regions. (Mapping with JMP® pro 15.0; basic data from the Environmental Information System (UIS) of the LUBW State Institute for the Environment Baden-Wuerttemberg and basic data © State Office for Geoinformation and Rural Development Baden-Wuerttemberg ([www.lgl-bw.de](http://www.lgl-bw.de)))

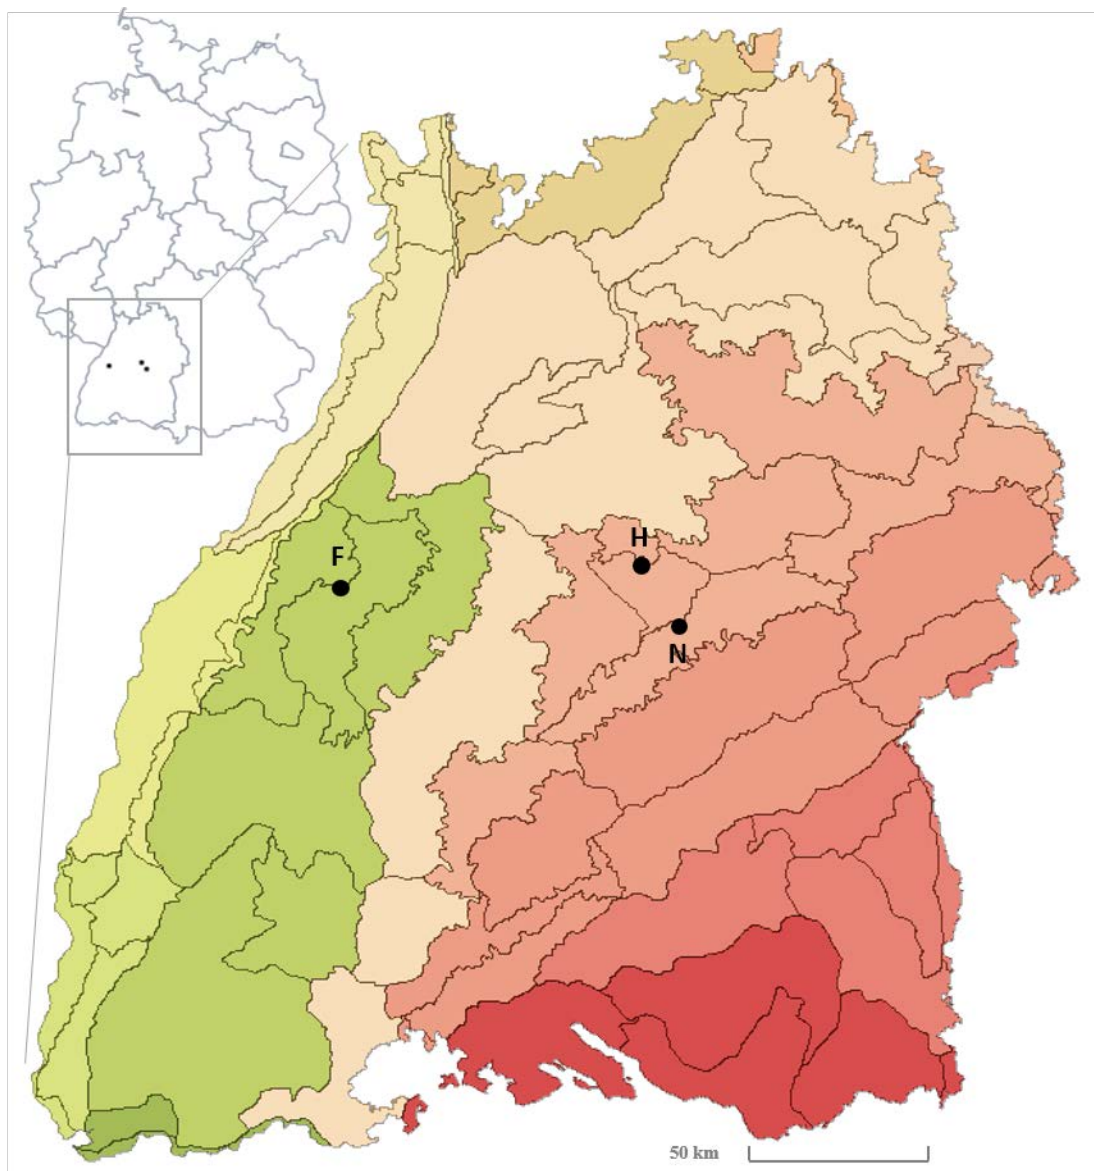

**Figure S2** Storage cabinet with moisture meter and saturated sodium chloride solution (“warm” storage condition)

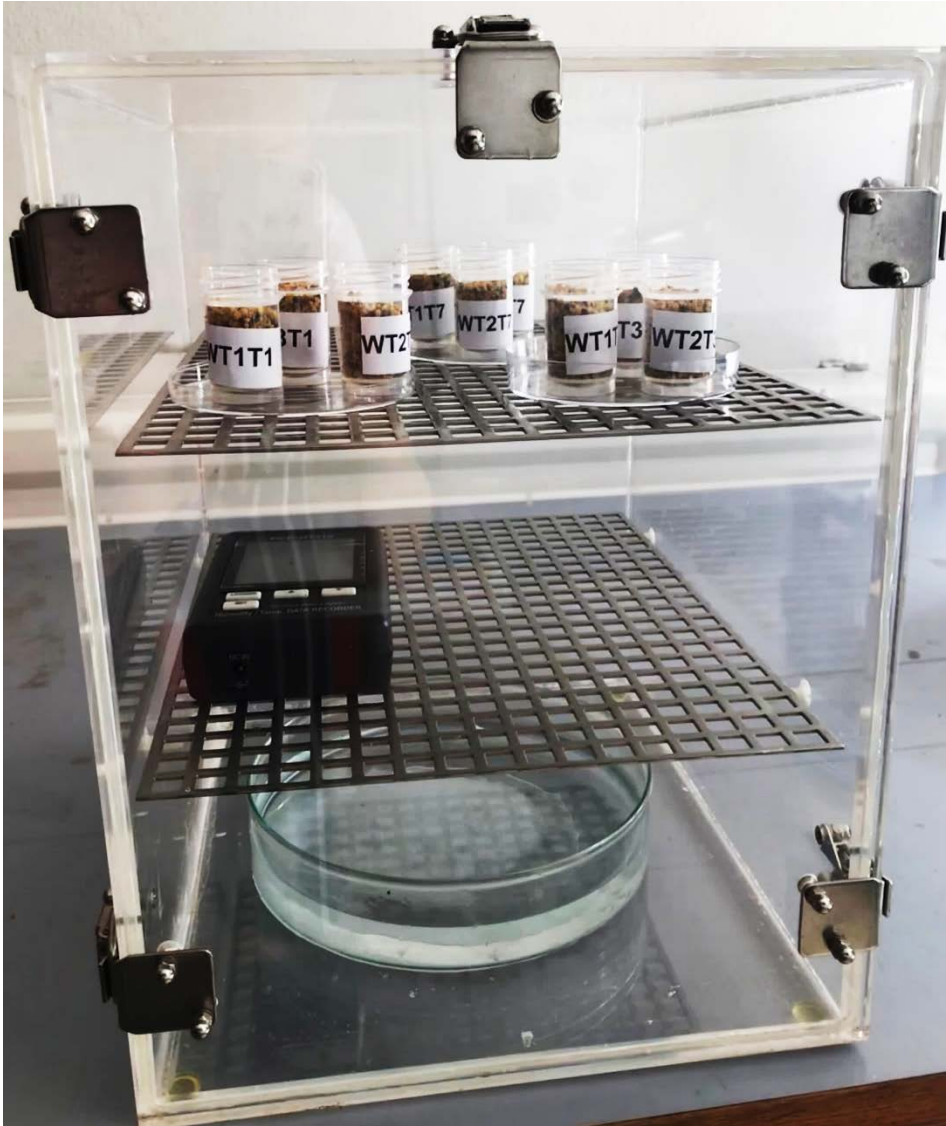

**Figure S3** Stack bar chart, showing the composition of bacterial (a) and fungal (b) communities of Dataset 1 (H) and Dataset 2 (F and N) (filtered on minimum of 10% average) in fresh and stored bee pollen

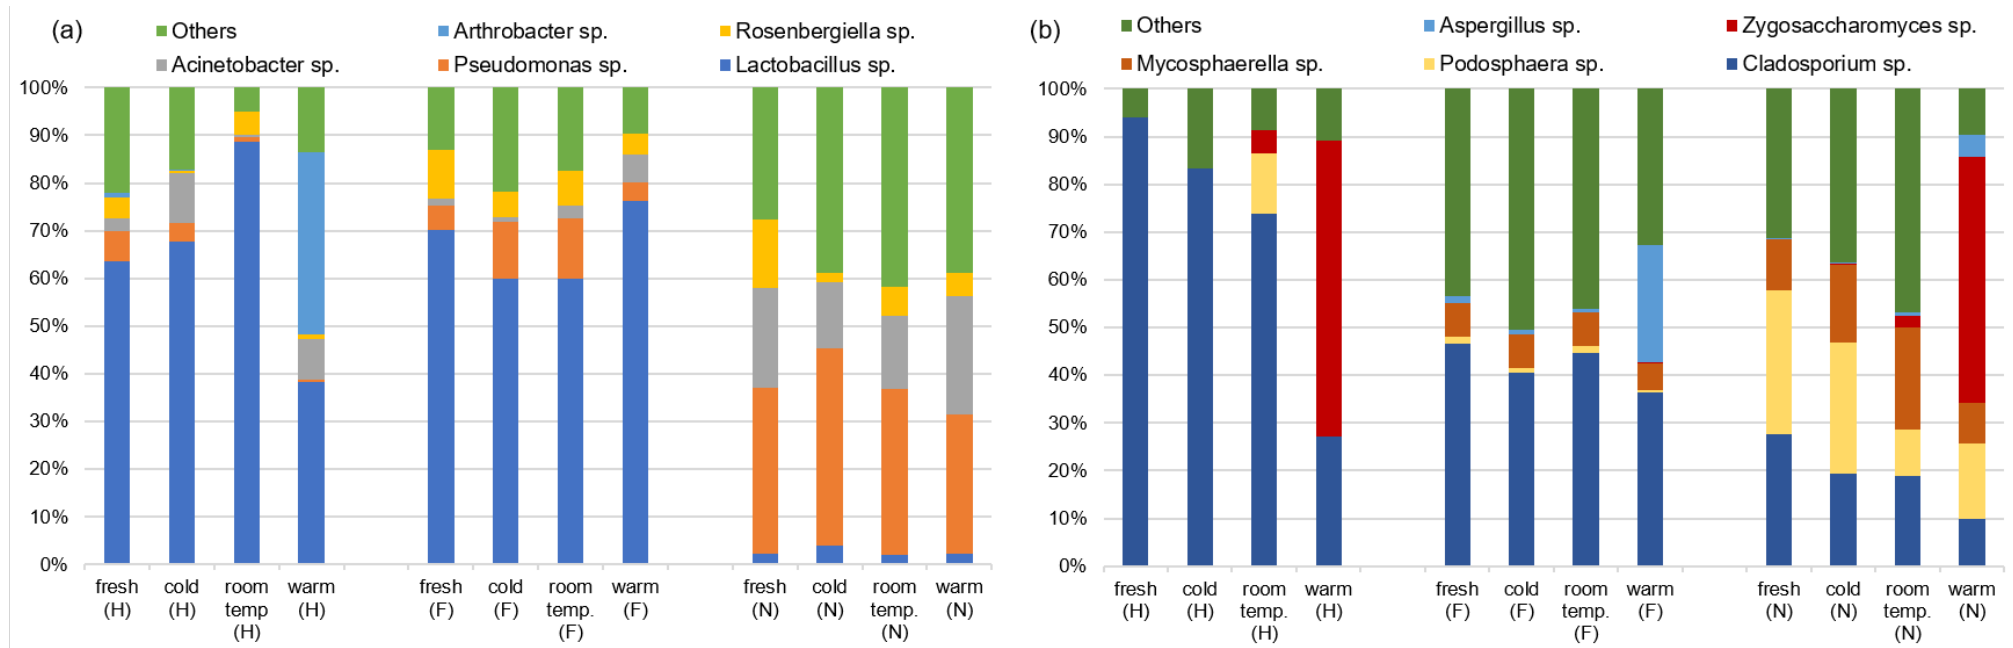

Supplement: 11356_2021_13932_MOESM1_ESM.pdf [file 11356_2021_13932_MOESM1_ESM.pdf]
